# Supplementary material for: Increased soluble urokinase plasminogen activator levels modulate monocyte function to promote atherosclerosis
Source: JCI journal article supplement (doi:10.1172/jci158788), 2022-10-04
Supplement: sd1 [file 1]

## Supplementary Appendix

- I. Page 2** – Members of the DBDS Genomic Consortium
- II. Page 3** – Regeneron Genetics Center Banner Author List and Contribution Statements
- III. Page 5** – Figure S1: Adjusted mean CAC score at baseline and follow-up by suPAR categories
- IV. Page 6** – Figure S2: Adjusted Kaplan-Meier cumulative incidence of any cardiovascular disease event by suPAR categories
- V. Page 7** – Figure S3: Association between baseline suPAR and incidence of any cardiovascular disease event
- VI. Page 8** – Figure S4: Distribution of suPAR levels by cohort
- VII. Page 9** – Figure S5: Manhattan plot for genome-wide associations with suPAR in multi-ancestry and European ancestry
- VIII. Page 10** – Figure S6: UPAR protein sequence and missense variant annotation
- IX. Page 11-14** – Figure S7: Regional plots for loci associated with suPAR from European-ancestry analysis
- X. Page 15-16** – Figure S8: Regional plots in the PLAUR locus after sequential conditional analysis on top variants
- XI. Page 17** – Figure S9: PLAUR gene expression and uPAR cellular distribution in HEK cells
- XII. Page 18** – Figure S10: Immunostaining of murine liver tissue showing successful production of suPAR
- XIII. Page 19** – Figure S11: Mendelian randomization of genetically predicted suPAR by rs4760 with CVD in CARDIoGRAM and MVP
- XIV. Page 20** – Figure S12: Mendelian randomization phenome-wide association of genetically predicted suPAR by rs2302524 with CVD and rare damaging missense variants' impact on the odds of ischemic heart disease
- XV. Page 21** – Figure S13: Association of suPAR with creatinine-derived eGFR and CKD as predicted by rs4760 PLAUR missense variant in CKDGen and UKB
- XVI. Page 22** – Figure S14: Cholesterol and suPAR levels in wild-type and transgenic mice prior to and 10 weeks after PSCK9-AAV transfection

- XVII. Page 23** – Figure S15: Cholesterol, atherosclerotic lesion and necrotic sinus area in wild-type and transgenic mice over-expressing suPAR stratified by sex (male n=11, female n=7)
- XVIII. Page 24** – Figure S16: SuPAR is detectable in both wild-type and suPAR-Tg atherosclerotic plaque
- XIX. Page 25** – Figure S17: Bone marrow-derived macrophages exhibit a pro-atherogenic phenotype compared to WT bone marrow-derived macrophages
- XX. Page 26** – Figure S18: QQ plots for genome-wide associations with suPAR
- XXI. Page 27** – Figure S19: Chromatogram by Sanger sequencing of PLAUR reference allele and variants
- XXII. Page 28** – Table S1: Baseline characteristics of MESA cohort by suPAR categories
- XXIII. Page 29** – Table S2: Association between baseline CAC score and suPAR levels
- XXIV. Page 30** – Table S3: Longitudinal association between baseline suPAR levels and CAC score during follow-up
- XXV. Page 31** – Table S4: Survival analysis for baseline suPAR levels and CVD events
- XXVI. Page 32** – Table S5: Survival analysis for baseline suPAR levels and CVD events in MESA with time-varying eGFR
- XXVII. Page 33** – Table S6: Multivariable survival analysis for baseline suPAR levels and CVD events in MESA with high-sensitivity troponin T and NT-proBNP
- XXVIII. Page 34** – Table S7: Top variants from genome-wide association analysis of suPAR in participants with European ancestry
- XXIX. Page 35** – Table S8: Finemapped signals of the PLAUR locus using SuSie.
- XXX. Page 36-37** – Table S9: UK Biobank Disease Phenotype Definitions
- XXXI. Page 38** – References

## Members of the DBDS Genomic Consortium

Steffen Andersen<sup>1</sup>

Karina Banasik<sup>2</sup>

Søren Brunak<sup>2</sup>

Kristoffer Burgdorf<sup>3</sup>

Christian Erikstrup<sup>4</sup>

Thomas Folkmann Hansen<sup>5</sup>

Henrik Hjalgrim<sup>6</sup>

Gregor Jemec<sup>7</sup>

Poul Jennum<sup>8</sup>

Pär Ingemar Johansson<sup>3</sup>

Kasper Rene Nielsen<sup>9</sup>

Mette Nyegaard<sup>10</sup>

Mie Topholm Brun<sup>11</sup>

Ole Birger Pedersen<sup>12</sup>

Susan Mikkelsen<sup>13</sup>

Khoa Manh Dinh<sup>13</sup>

Erik Sørensen<sup>3</sup>

Henrik Ullum<sup>3</sup>

Sisse Rye Ostrowski<sup>3</sup>

Thomas Werge<sup>14</sup>

Daniel Gudbjartsson<sup>15</sup>

Kari Stefansson<sup>15</sup>

Hreinn Stefánsson<sup>15</sup>

Unnur Þorsteinsdóttir<sup>15</sup>

Margit Anita Hørup Larsen<sup>3</sup>

Maria Didriksen<sup>3</sup>

Susanne Sækmose<sup>16</sup>

<sup>1</sup> Department of Finance Copenhagen Business School Copenhagen Denmark

<sup>2</sup> Novo Nordisk Foundation Center for Protein Research Faculty of Health and Medical Sciences University of Copenhagen Copenhagen Denmark

<sup>3</sup> Department of Clinical Immunology Copenhagen University Hospital Copenhagen Denmark

<sup>4</sup> Department of Clinical Immunology Aarhus University Hospital Aarhus Denmark

<sup>5</sup> Danish Headache Center Department of Neurology Rigshospitalet Glostrup Denmark

<sup>6</sup> Department of Epidemiology Research Statens Serum Institut Copenhagen Denmark

<sup>7</sup> Department of Clinical Medicine Zealand University Hospital Roskilde Denmark

<sup>8</sup> Department of Clinical Neurophysiology at University of Copenhagen Copenhagen Denmark

<sup>9</sup> Department of Clinical Immunology Aalborg University Hospital Aalborg Denmark

<sup>10</sup> Department of Biomedicine Aarhus University Denmark

<sup>11</sup> Department of Clinical Immunology Odense University Hospital Odense Denmark

<sup>12</sup> Department of Clinical Immunology Zealand University Hospital, Køge Denmark

<sup>13</sup> Department of Clinical Immunology Aarhus University Hospital Aarhus Denmark

<sup>14</sup> Institute of Biological Psychiatry Mental Health Centre Sct. Hans Copenhagen University Hospital Roskilde Denmark

<sup>15</sup> deCODE genetics Reykjavik Iceland

<sup>16</sup> Department of Clinical Immunology, Zealand University Hospital Køge Denmark

# **Regeneron Genetics Center Banner Author List and Contribution Statements**

## **RGC Management and Leadership Team**

Goncalo Abecasis, D.Phil. , Aris Baras, M.D. , Michael Cantor, M.D. , Giovanni Coppola, M.D. , Andrew Deubler , Aris Economides, Ph.D. , Katia Karalis, Ph.D. , Luca A. Lotta, M.D., Ph.D. , John D. Overton, Ph.D. , Jeffrey G. Reid, Ph.D. , Katherine Siminovitch, M.D. , Alan Shuldiner, M.D.

## **Sequencing and Lab Operations**

Christina Beechert , Caitlin Forsythe, M.S. , Erin D. Fuller , Zhenhua Gu, M.S. , Michael Lattari , Alexander Lopez, M.S., John D. Overton, Ph.D. , Maria Sotiropoulos Padilla, M.S. , Manasi Pradhan, M.S. , Kia Manoochehri, B.S. , Thomas D. Schleicher, M.S. , Louis Widom , Sarah E. Wolf, M.S. , Ricardo H. Ulloa, B.S.

## **Clinical Informatics**

Amelia Averitt, Ph.D. , Nilanjana Banerjee, Ph.D. , Michael Cantor, M.D. , Dadong Li, Ph.D. , Sameer Malhotra, M.D. , Deepika Sharma, MHI , Jeffrey Staples , Ph.D.

## **Genome Informatics**

Xiaodong Bai, Ph.D. , Suganthi Balasubramanian, Ph.D. , Suying Bao, Ph.D. , Boris Boutkov, Ph.D. , Siying Chen, Ph.D. , Gisu Eom, B.S. , Lukas Habegger, Ph.D. , Alicia Hawes, B.S. , Shareef Khalid , Olga Krasheninina, M.S. , Rouel Lanche, B.S. , Adam J. Mansfield, B.A. , Evan K. Maxwell, Ph.D. , George Mitra, B.A. , Mona Nafde, M.S. , Sean O’Keeffe, Ph.D. , Max Orelus, B.B.A. , Razvan Panea, Ph.D. , Tommy Polanco, B.A. , Ayesha Rasool, M.S. , Jeffrey G. Reid, Ph.D. , William Salerno, Ph.D. , Jeffrey C. Staples, Ph.D. , Kathie Sun, Ph.D. , Jiwen Xin, Ph.D.

## **Analytical Genomics and Data Science**

Goncalo Abecasis, D.Phil. , Joshua Backman, Ph.D. , Amy Damask, Ph.D. , Lee Dobbyn, Ph.D. , Manuel Allen Revez Ferreira, Ph.D. , Arkopravo Ghosh, M.S. , Christopher Gillies, Ph.D. , Lauren Gurski, B.S. , Eric Jorgenson, Ph.D. , Hyun Min Kang, Ph.D. , Michael Kessler, Ph.D. , Jack Kosmicki, Ph.D. , Alexander Li , Ph.D. , Nan Lin, Ph.D. , Daren Liu, M.S. , Adam Locke, Ph.D. , Jonathan Marchini, Ph.D. , Anthony Marcketta, M.S. , Joelle Mbatchou, Ph.D. , Arden Moscati, Ph.D. , Charles Paulding, Ph.D. , Carlo Sidore, Ph.D. , Eli Stahl, Ph.D. , Kyoko Watanabe, Ph.D. , Bin Ye, Ph.D. , Blair Zhang, Ph.D. , Andrey Ziyatdinov, Ph.D.

## **Therapeutic Area Genetics**

Ariane Ayer, B.S. , Aysegul Guvenek, Ph.D. , George Hindy, Ph.D. , Giovanni Coppola, M.D. , Jan Freudenberg, M.D. , Jonas Bovijn M.D. , Julie Horowitz, Ph.D. , Katherine Siminovitch, M.D. , Jonas B. Nielsen, MD, PhD, Kavita Praveen, Ph.D. , Luca A. Lotta, M.D. , Manav Kapoor, Ph.D. , Mary Haas, Ph.D. , Moeen Riaz , Ph.D. , Niek Verweij, Ph.D. , Olukayode Sosina, Ph.D. , Parsa Akbari, Ph.D. , Priyanka Nakka, Ph.D. , Sahar Gelfman, Ph.D. , Sujit Gokhale, B.E. , Tanima De, Ph.D. , Veera Rajagopal, Ph.D. , Alan Shuldiner, M.D. , Bin Ye, Ph.D. , Gannie Tzoneva, Ph.D. , Juan Rodriguez-Flores, Ph.D.

## **RGC Biology**

Shek Man Chim, Ph.D. , Valerio Donato, Ph.D. , Aris Economides, Ph.D. , Daniel Fernandez, M.S. , Giusy Della Gatta, Ph.D. , Alessandro Di Gioia, Ph.D. , Kristen Howell, M.S. , Katia Karalis, Ph.D. , Lori Khrimian, Ph.D. , Minhee Kim, Ph.D. , Hector Martinez , Lawrence Miloscio, B.S. , Sheilyn Nunez, B.S. , Elias Pavlopoulos, Ph.D. , Trikaladarshi Persaud, B.S.

## **Research Program Management & Strategic Initiatives**

Esteban Chen, M.S. , Marcus B. Jones, Ph.D. , Michelle G. LeBlanc, Ph.D. , Jason Mighty, Ph.D. , Lyndon J. Mitnaul, Ph.D. , Nirupama Nishtala, Ph.D. , Nadia Rana, Ph.D.

**Figure S1. Adjusted mean change in CAC score between baseline and follow-up by suPAR categories**

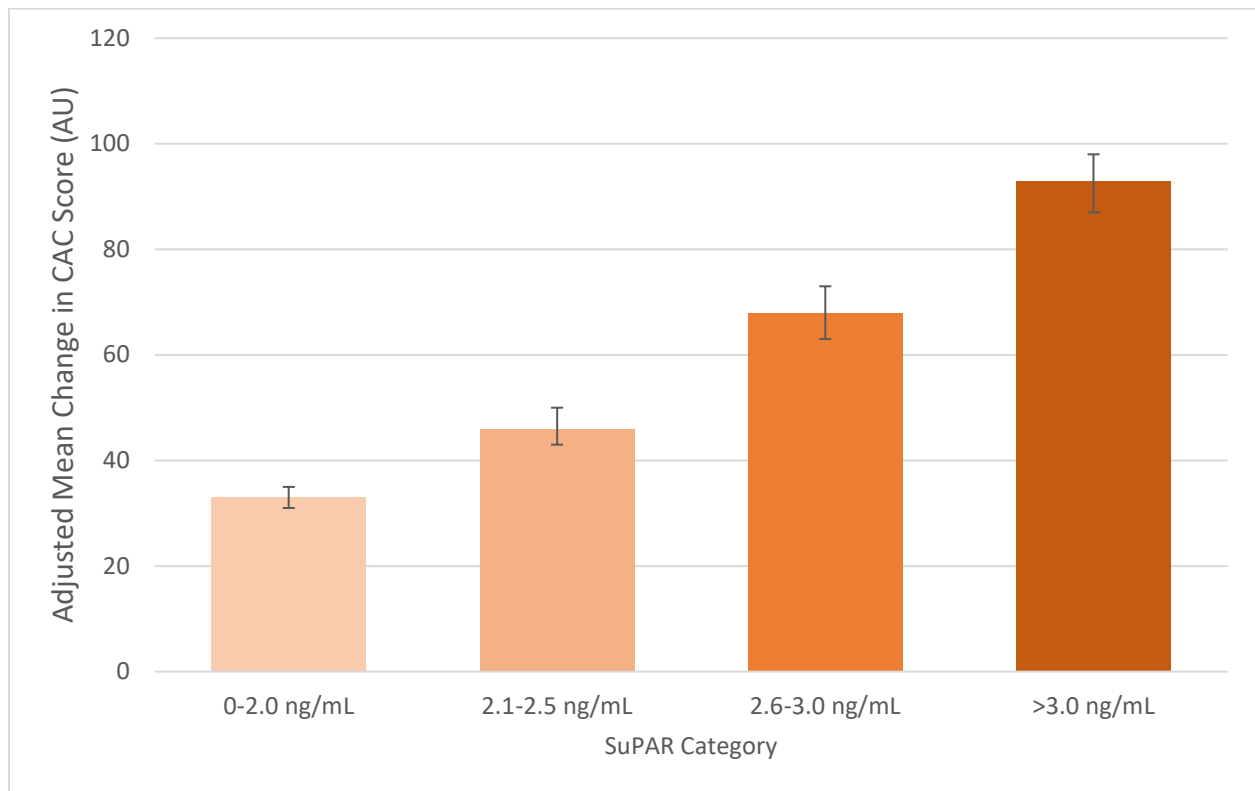

Adjusted mean change in CAC score (Agaston units [AU]) based on Agaston scoring method between baseline and initial follow-up visit (follow-up minus baseline) stratified by suPAR categories: 0-2.0 ng/mL, 2.0-2.5 ng/mL, 2.5-3.0 ng/mL, and >3.0 ng/mL. Mean CAC score for each category based on the predicted CAC score values accounting for age, sex, race, body-mass index, history of smoking, estimated glomerular filtration rate, low density lipoprotein levels, high density lipoprotein levels, C-reactive protein, and diabetes mellitus. Error bars represent 95% confidence intervals. Abbreviations: CAC, coronary artery calcium; MESA, Multi-Ethnic Study of Atherosclerosis; suPAR, soluble urokinase plasminogen activator receptor

**Figure S2. Adjusted Kaplan-Meier cumulative incidence of any cardiovascular disease event by suPAR categories**

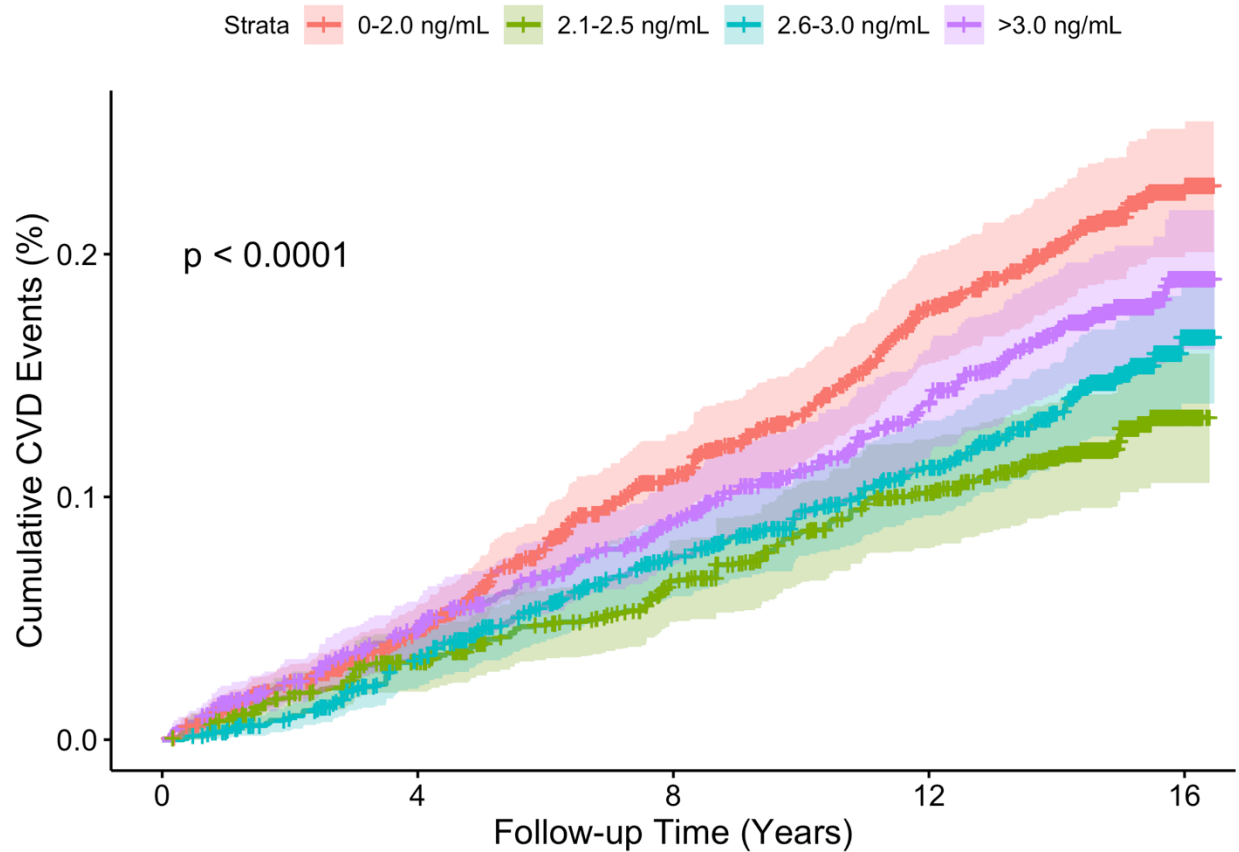

Inverse-probability weighted Kaplan-Meier curves for the cumulative incidence of cardiovascular disease (CVD) events stratified by suPAR categories: 0-2.0 ng/mL (red), 2.0-2.5 ng/mL (green), 2.5-3.0 ng/mL (blue), >3 ng/mL (purple). Propensity scores were estimated for suPAR categories using generalized boost models adjusted for age, sex, race, body-mass index, history of smoking, estimated glomerular filtration rate, low density lipoprotein levels, high density lipoprotein levels, C-reactive protein, and diabetes mellitus. The difference in cumulative incidence curves between suPAR categories was tested using the log-rank test. A CVD event was defined as the composite of myocardial infarction, resuscitated cardiac arrest, angina, revascularization, stroke (excluding transient ischemic attack), or death due to CVD.

**Figure S3. Association between baseline suPAR (per 100% increase) and incidence of any cardiovascular disease event**

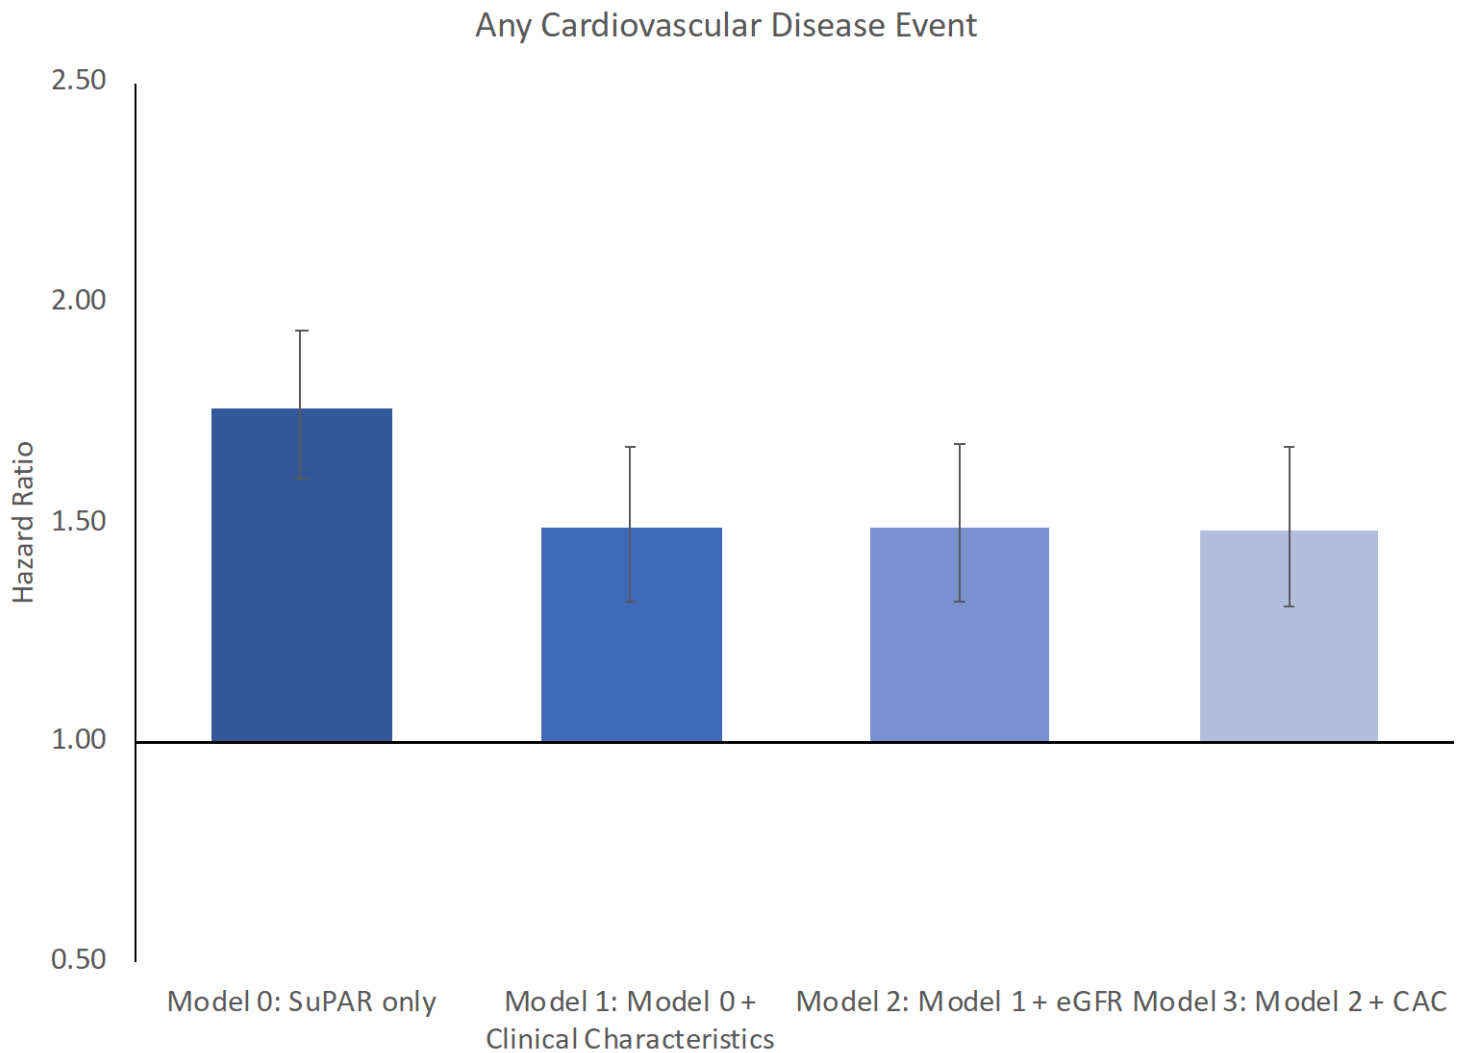

Bar graphs showing the hazard ratio (represented by height of the bar) and 95% confidence intervals (represented by error bars) for the association of suPAR (per 100%) and incidence of cardiovascular disease. Model 0: suPAR only; Model 1: suPAR and age, sex, race, body-mass index, history of smoking, low-density lipoprotein, high-density lipoprotein, C-reactive protein, hypertension, and diabetes mellitus; Model 2: Model 1 + baseline estimated glomerular filtration rate; Model 3: Model 2 + baseline coronary artery calcification (CAC) score. A CVD event was defined as the composite of myocardial infarction, resuscitated cardiac arrest, angina, revascularization, stroke (excluding transient ischemic attack), or death due to CVD.

**Figure S4. Distribution of suPAR levels by cohort**

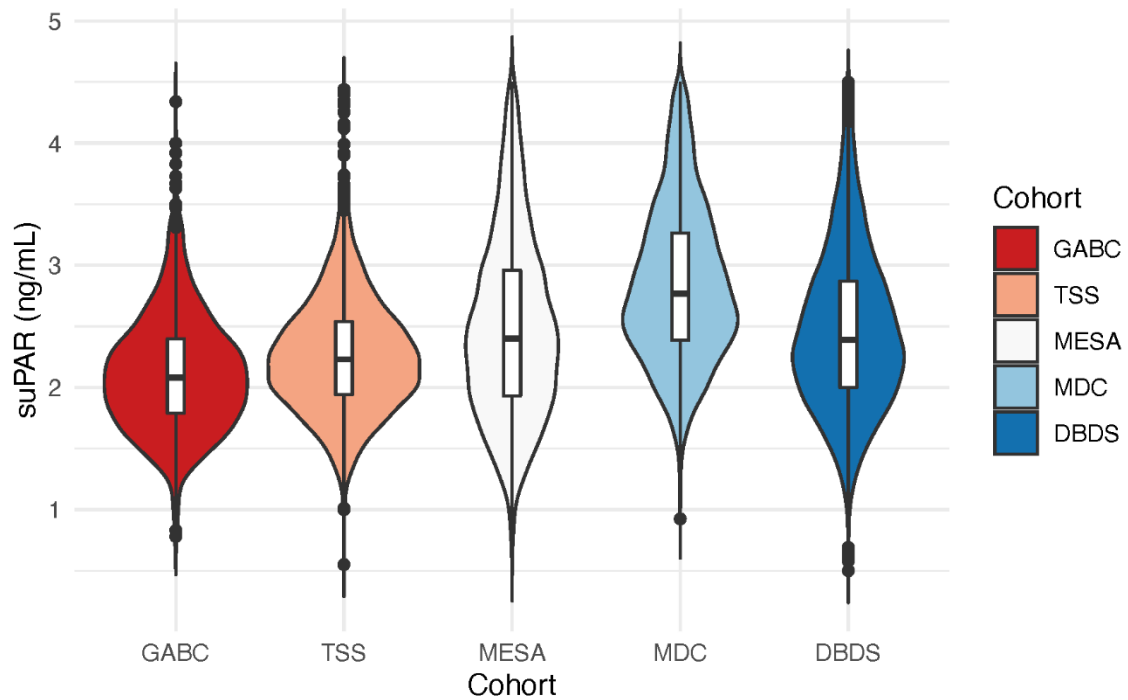

Violin and box plot for suPAR levels in each of the four main cohorts that are included in the overall meta-analysis and in the replication cohort. suPAR levels below 0.5 ng/mL and above 4.5 ng/mL were considered as outliers and excluded for the purposes of visualization. All the data including outliers were included in the analyses.

Abbreviations: GABC, Genes and Blood-Clotting study; TSS, The Trinity Student Study; MESA, Multi-Ethnic Study of Atherosclerosis; MDC, The Malmö Diet and Cancer study.



**Figure S5. Manhattan plot for genome-wide associations with suPAR in multi-ancestry and European ancestry analyses**

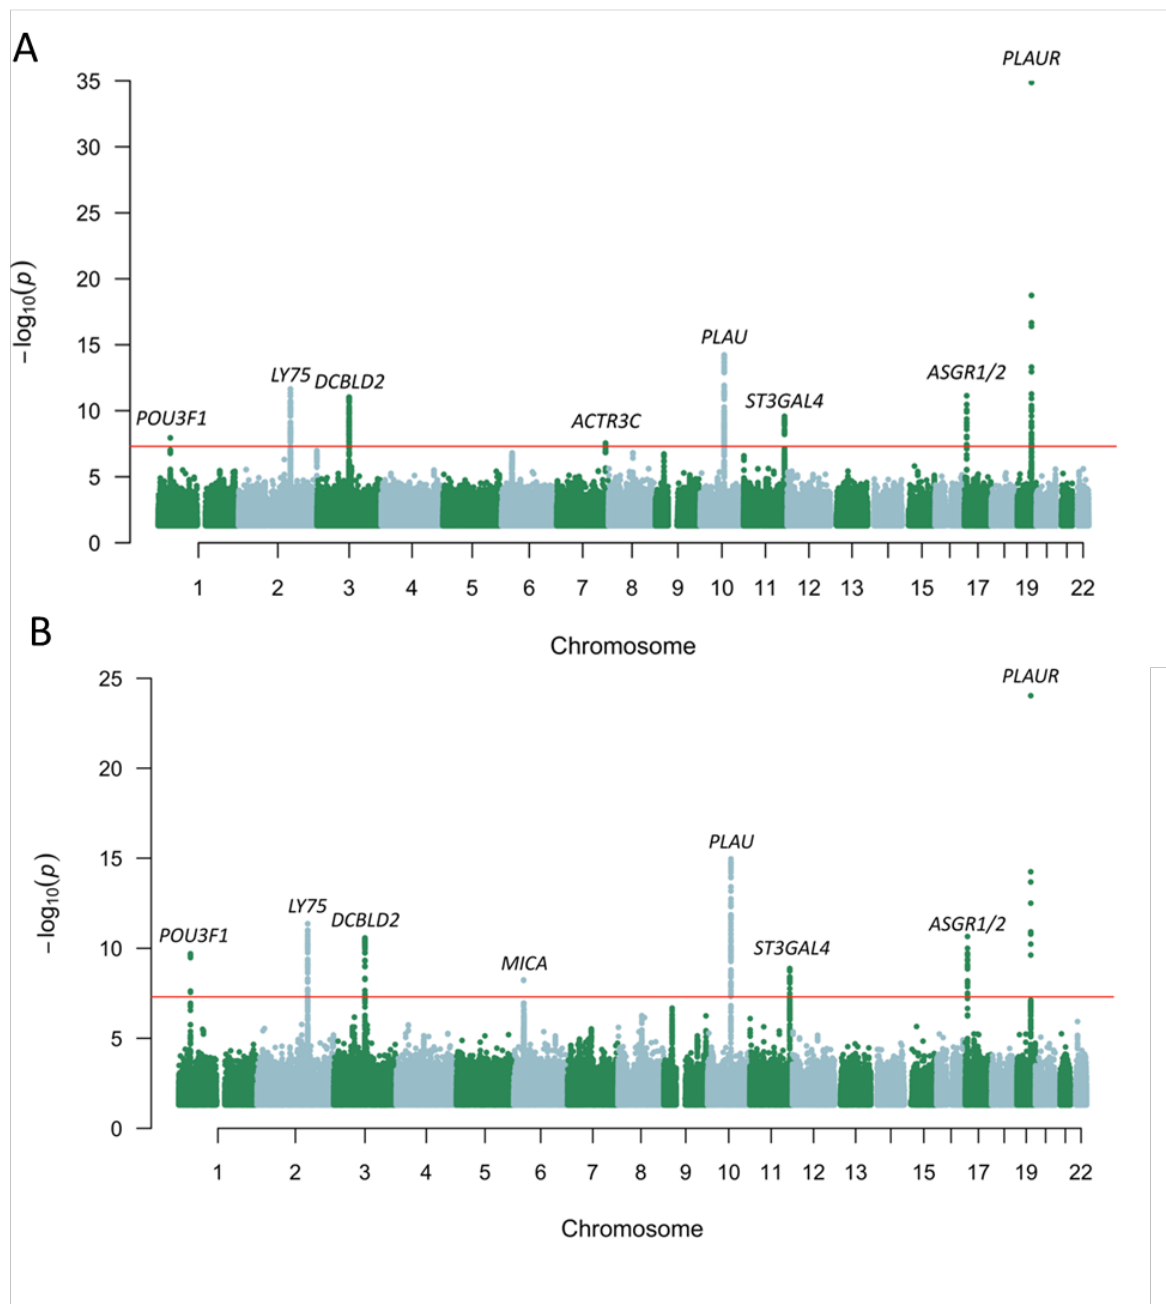

**Manhattan plots for genome-wide associations with suPAR.** Plot of the minus log10 of the P-values observed in the genome-wide meta-analysis of suPAR levels in multi-ancestry (A) and European ancestry (B) samples. Significant ( $P < 5 \times 10^{-8}$ ) signals were observed with variants in 8 genomic locations for both meta-analyses. The signal in the *ACTR3C* locus was specific to multi-ancestry analysis while the signal in *MICA* was specific to European ancestry analysis.

**Figure S6. UPAR protein sequence and missense variant annotation**

**A**

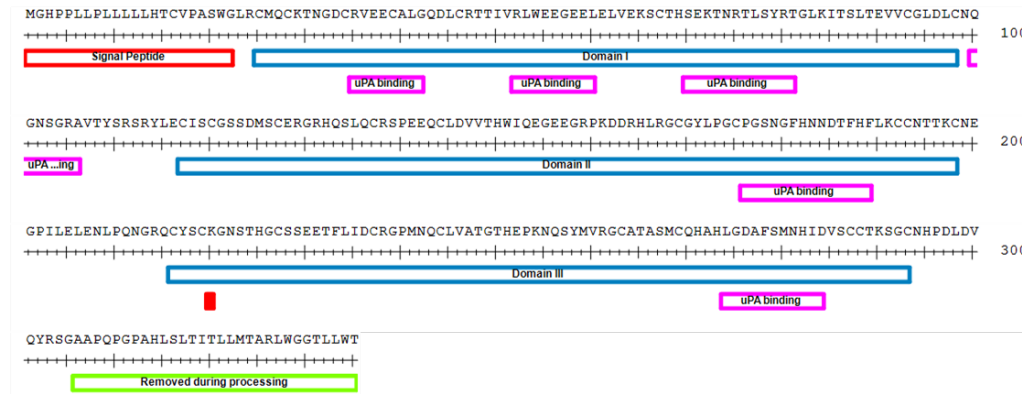

**B**

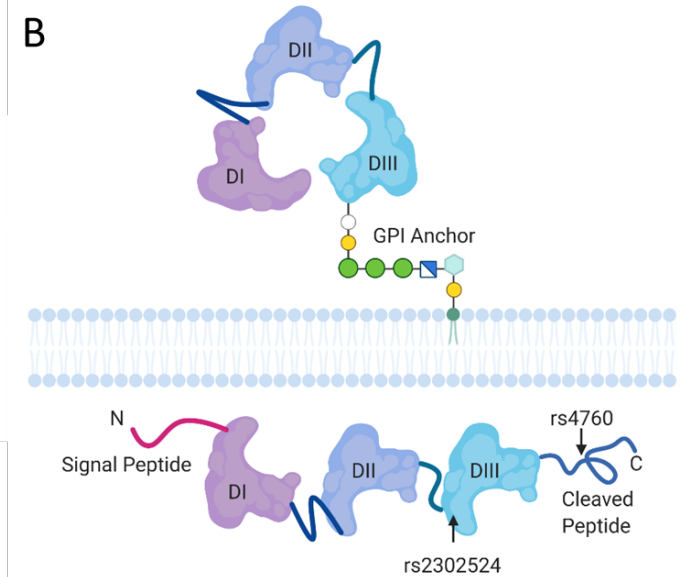

Panel (A) The linear amino acid sequence of the full-length transcript was obtained from Ensembl. Domain annotations and uPA binding domains were annotated using previously published data.<sup>1</sup> (B) Representative protein diagram where approximate location of missense mutations on preprotein is indicated with rs number and arrow. Images were generated using BioRender, [www.biorender.com](http://www.biorender.com).

**Figure S7. Regional plots for loci associated with suPAR from European-ancestry analysis**

**A. *PLAUR***

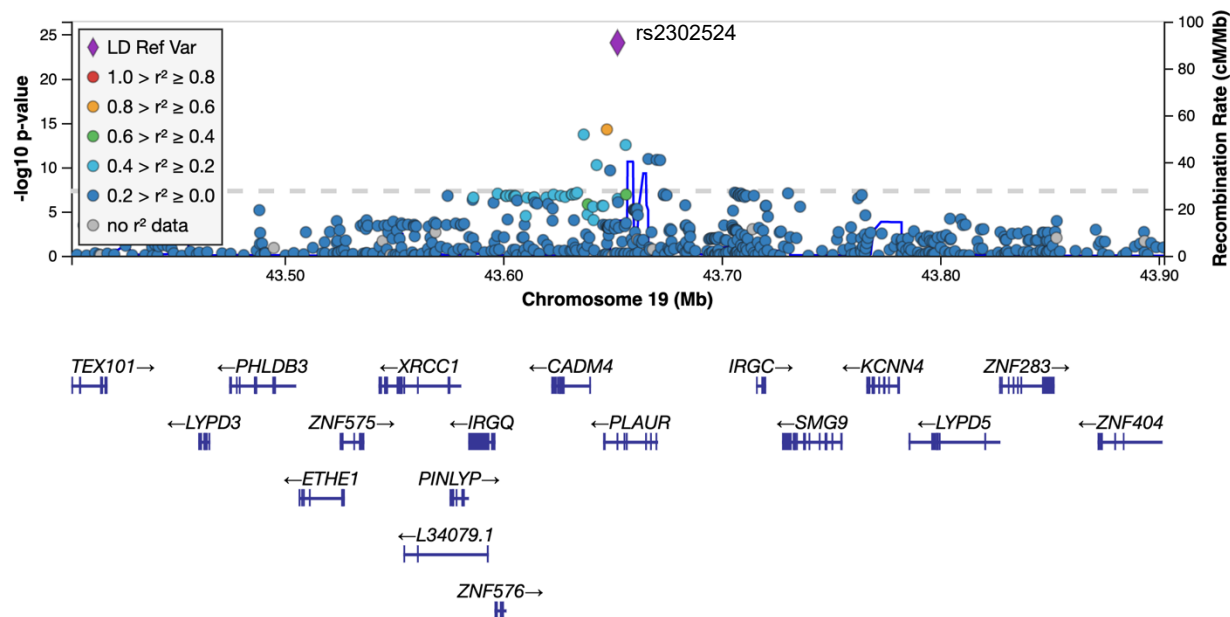

**B. *PLAU***

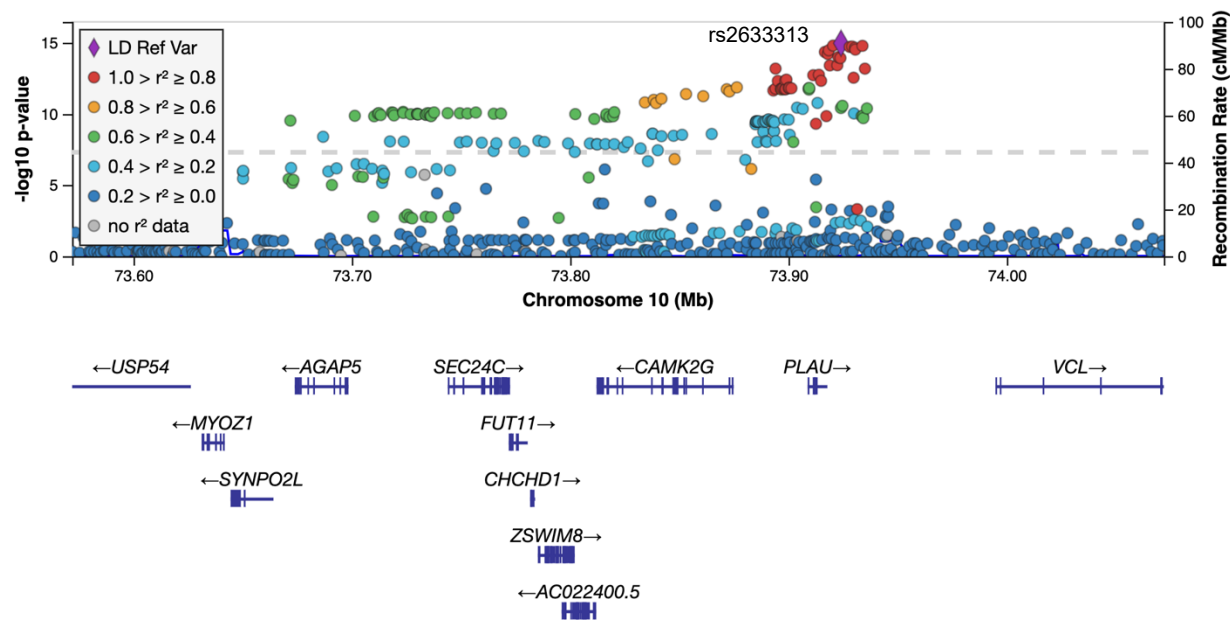

### C. *LY75*

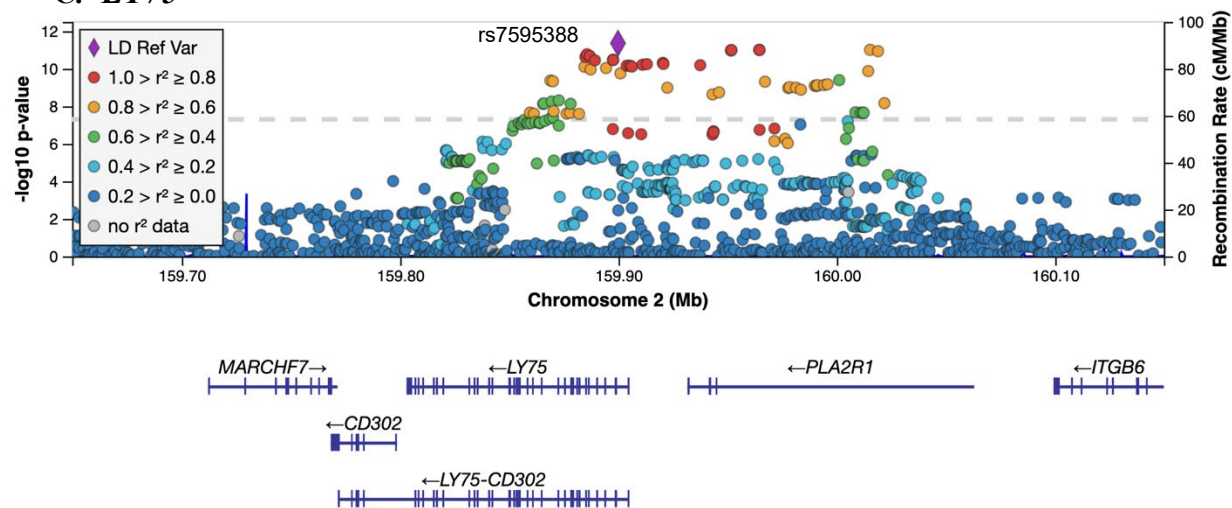

### D. *ASGR1*; *ASGR2*

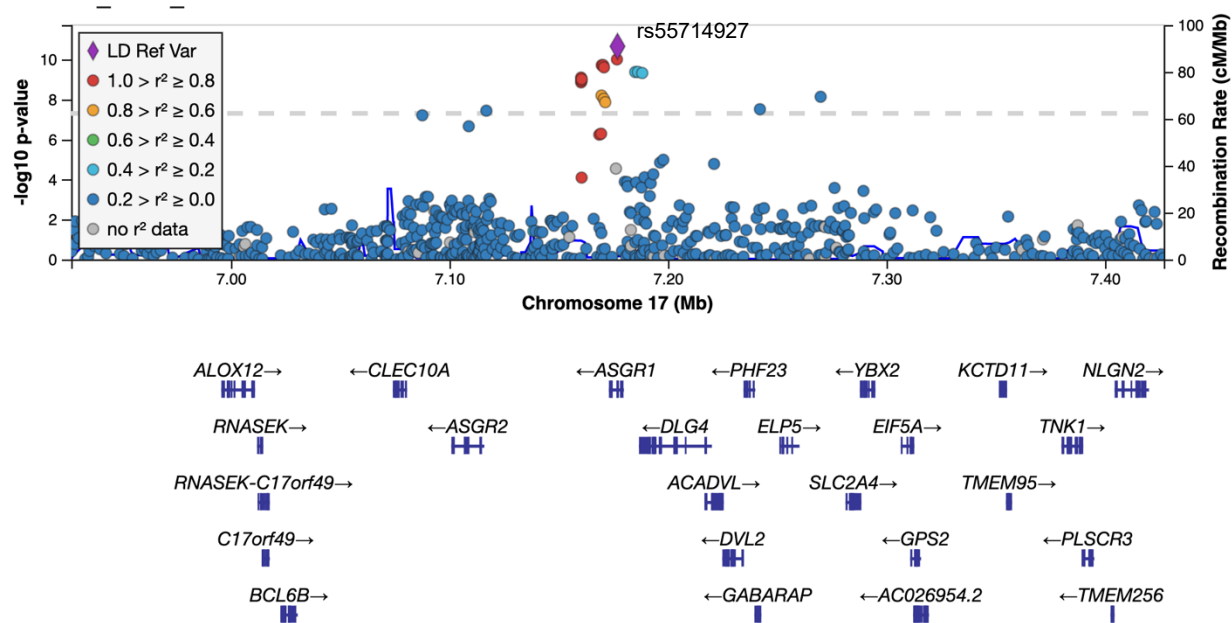

### E. *DCBLD2/ST3GAL6*

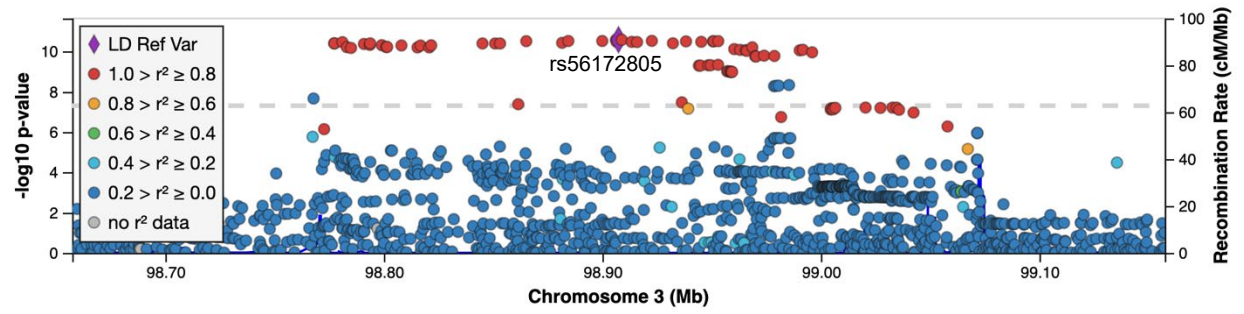

### F. *POU3F1*

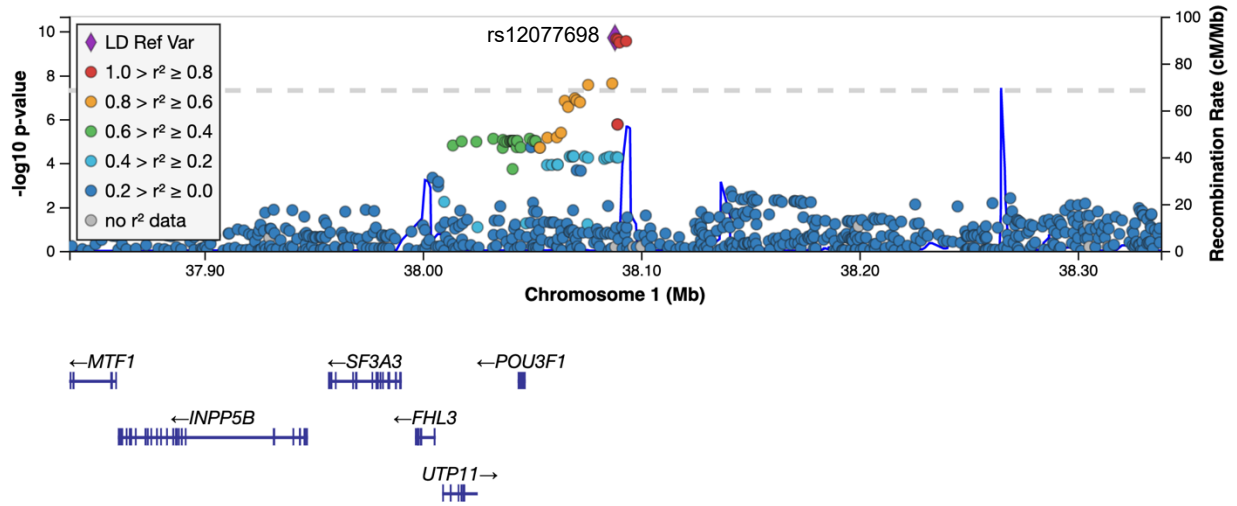

### G. *ST3GAL4*

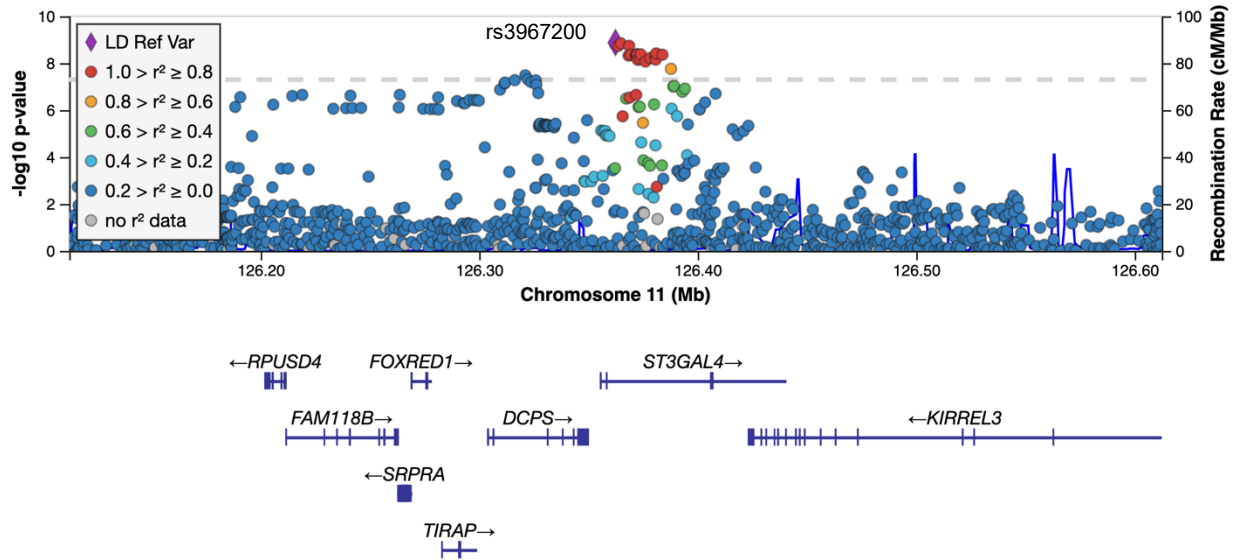

### H. *MICA*

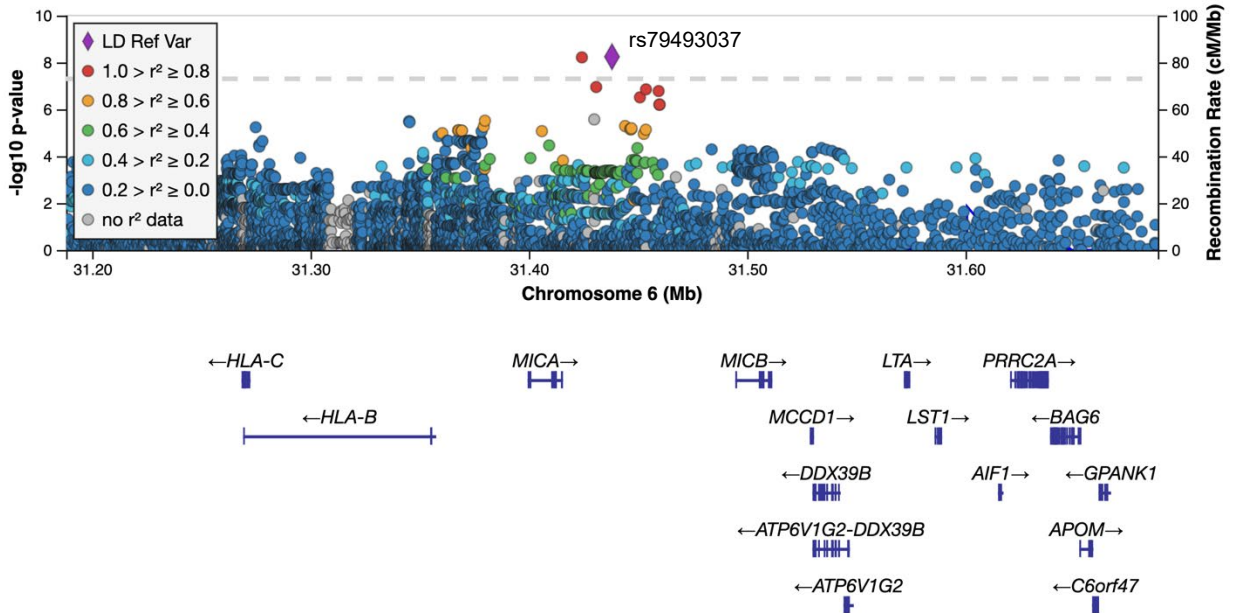

Plots of the minus log10 of the P-values observed in the genome-wide meta-analysis of suPAR levels in European ancestry of variants in each of the genome-wide significant loci. The horizontal dashed line was drawn at  $P = 5 \times 10^{-8}$ . The different colors denote the correlation with the variant with the lowest P value in each locus. The regional plots were drawn using LocusZoom.

**Figure S8. Regional plots in the *PLAUR* locus after sequential conditional analysis on top variants**

A. Conditional on rs2302524

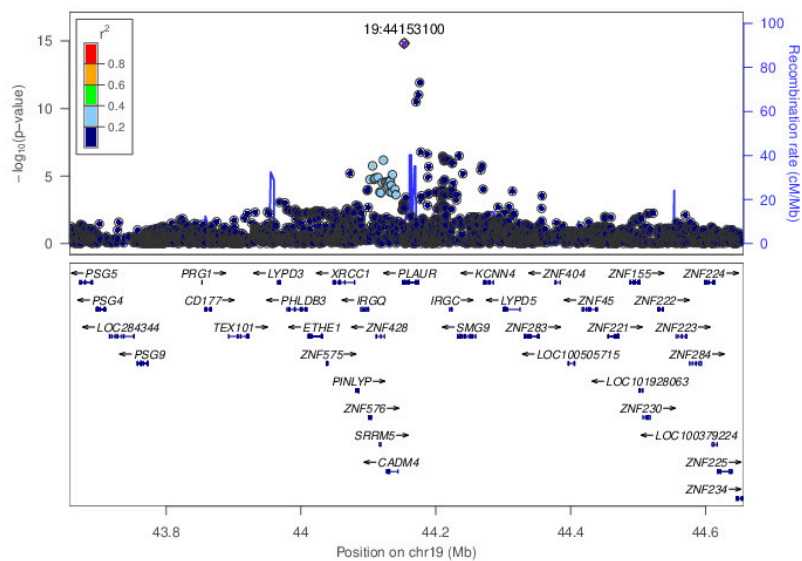

B. Conditional on rs2302524 and rs4760

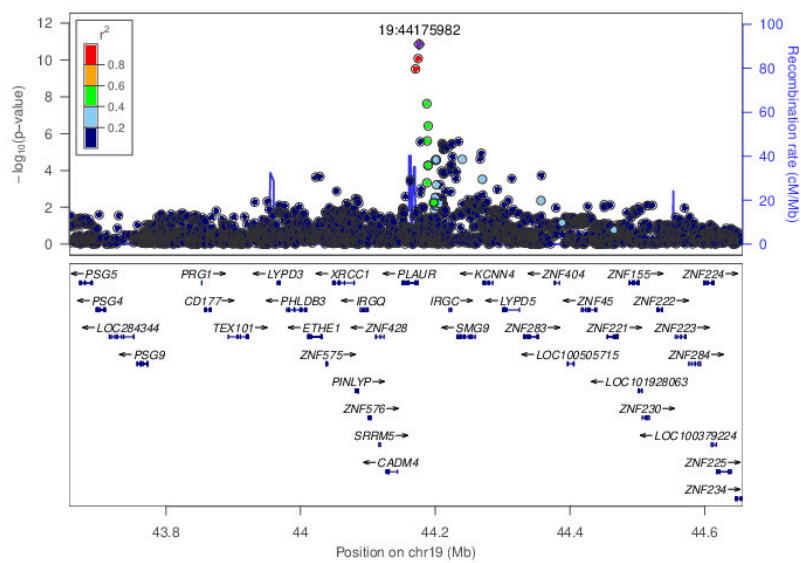

### C. Conditional on rs2302524, rs4760, and rs36229204

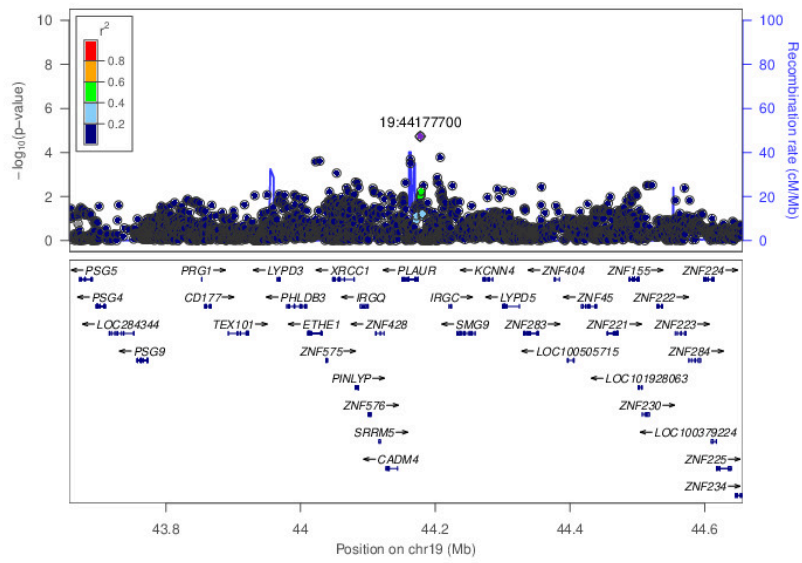



**Figure S9: PLAUR gene expression and uPAR cellular distribution in HEK cells**

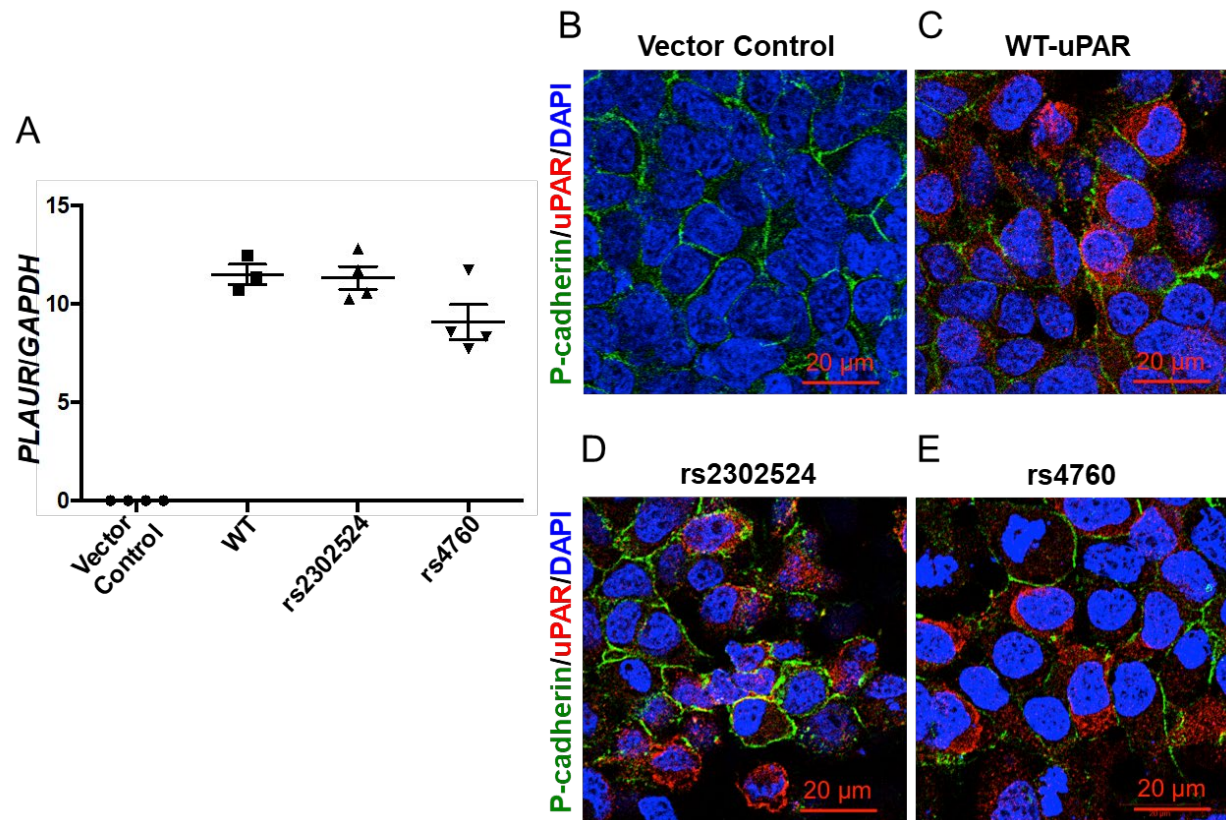

Panel A shows gene expression levels using real-time quantitative polymerase chain reaction analysis of uPAR mRNA in uPAR transfected HEK293T cells. Panels B to E show immunofluorescence staining of uPAR in HEK293T cells. Green staining represents P-cadherin, a member marker. uPAR is stained in red, and DAPI (4',6-diamidino-2-phenylindole) is a blue-fluorescent DNA stain.

**Figure S10. Immunostaining of murine liver tissue showing successful production of suPAR post-transfection**

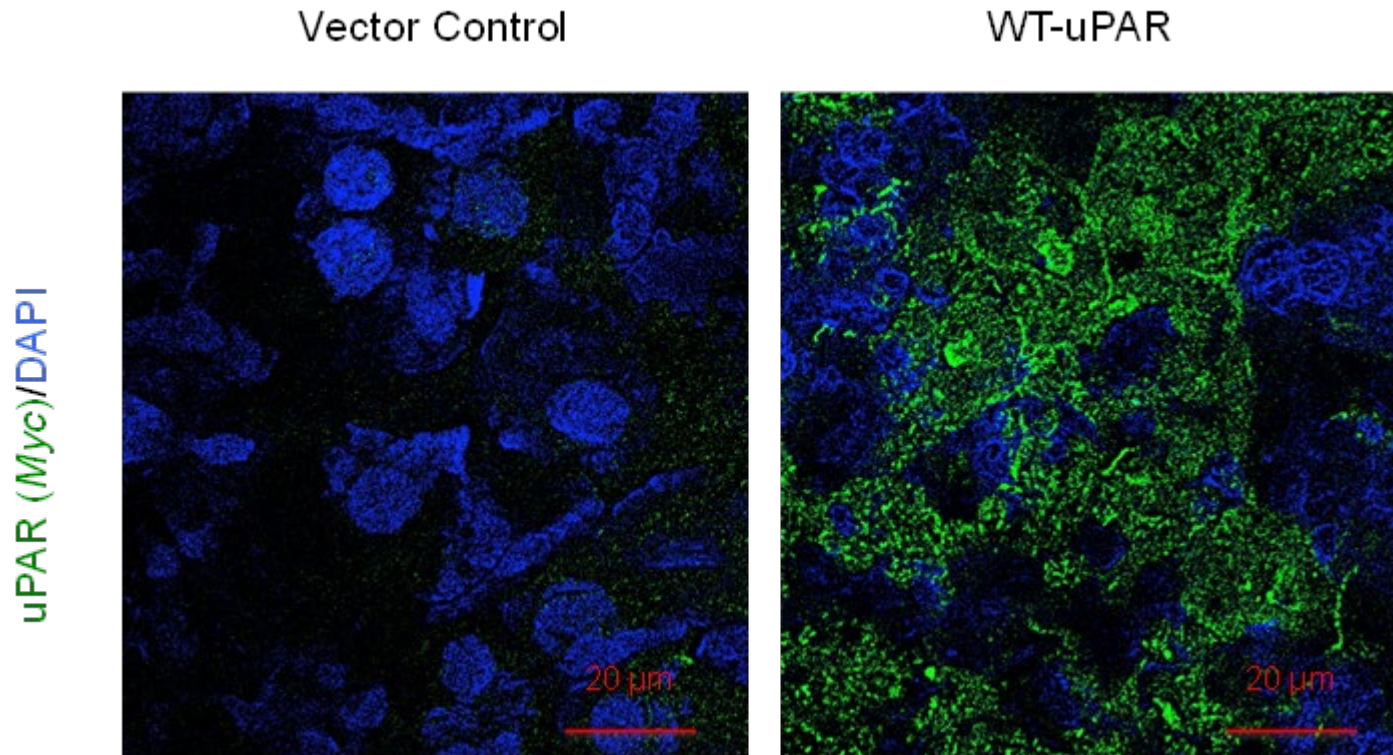

To confirm success of gene delivery in the liver and production of the protein post-hydrodynamic tail injection, we performed immunostaining of liver tissue using a Myc antibody detecting the c-terminal tag of uPAR-Myc fusion protein.

**Figure S10. Mendelian randomization of genetically predicted suPAR by rs4760 with CVD in CARDIoGRAM C4D and the Million Veteran Program (MVP)**

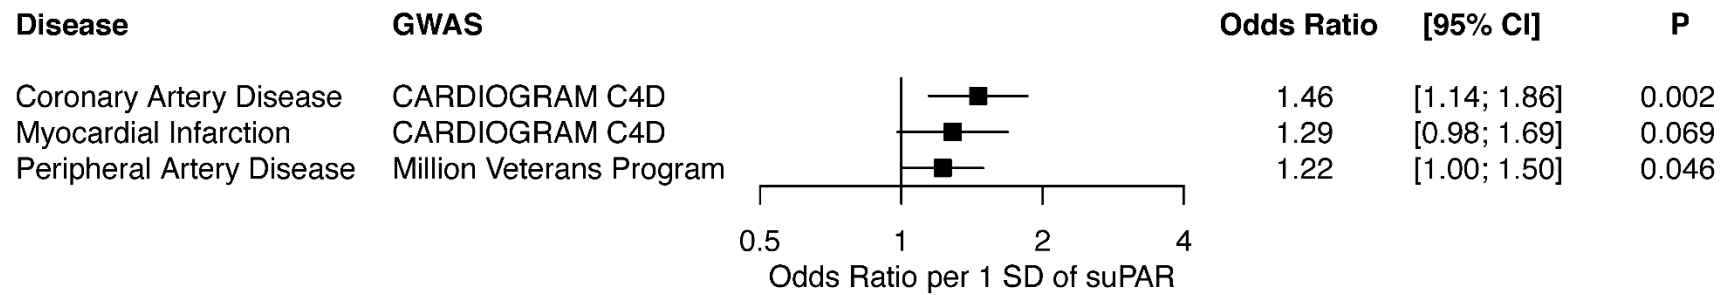

**Figure S11. Mendelian randomization phenome-wide association of genetically-predicted suPAR by rs2302524 with CVD and rare damaging missense variants' impact on the odds of ischemic heart disease**

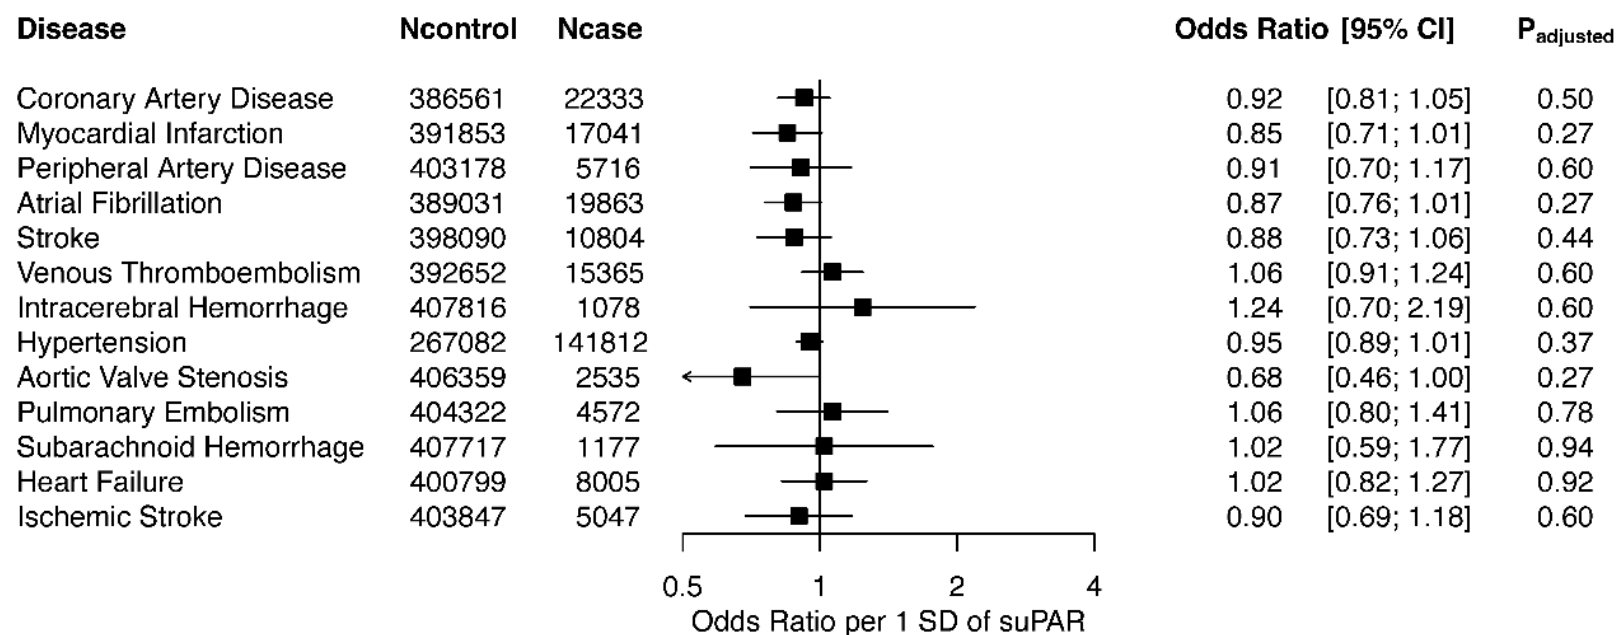

Causal effect of suPAR on 13 cardiovascular diseases by Mendelian randomization using missense variant rs2302524 as instrument. Effect estimates are provided per 1 standard deviation (SD) increase in suPAR levels. P values were adjusted using the false discovery rate method.

**Figure S12. Association of suPAR with creatinine-derived eGFR and CKD as predicted by rs4760 *PLAUR* missense variant**

**A**

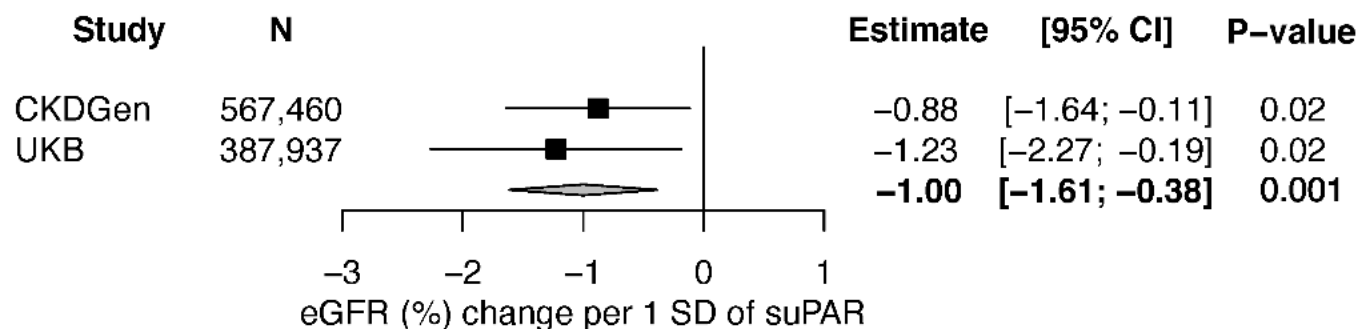

**B**

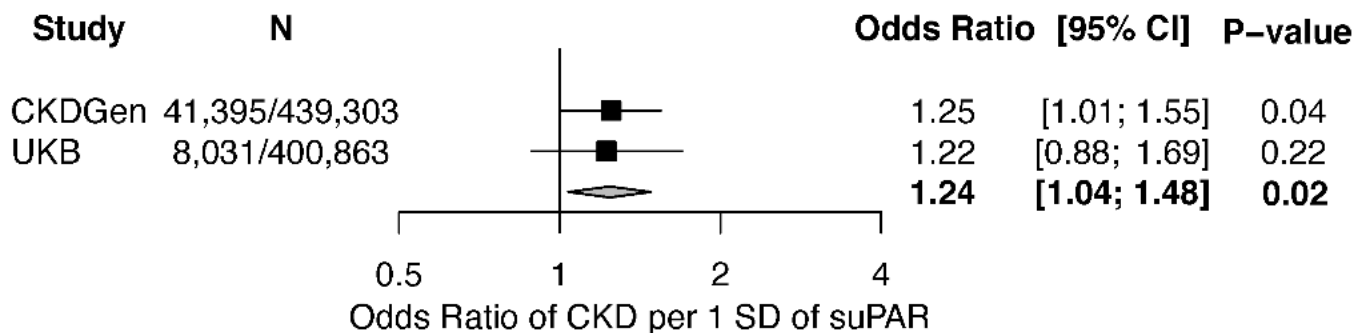

Mendelian randomization (MR) analysis for suPAR association with (A) estimated glomerular filtration rate (eGFR) and (B) chronic kidney disease (CKD) using summary data from the Chronic Kidney Disease (CKDGen) genome-wide association study and UK Biobank (UKB). Estimates per 1 standard deviation increments of suPAR instrumented by rs4760 were obtained using Wald ratio. Pooled effect estimates for both CKDGen and UKB were obtained using fixed-effects meta-analysis.

**Figure S13. Cholesterol and suPAR levels in wild-type and transgenic mice prior to and 10 weeks after PCSK9-AAV transfection**

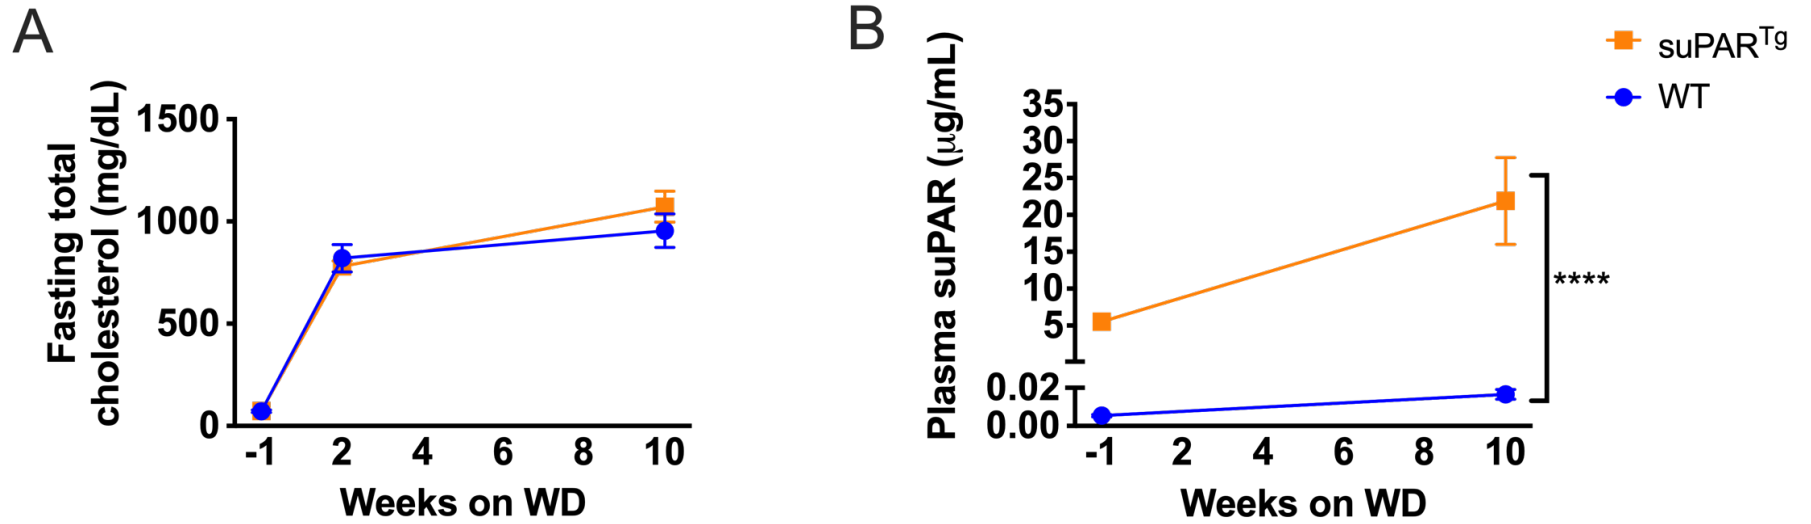

A, Fasting total cholesterol was quantified from plasma via colorimetric assay. Baseline measure was from immediately prior to PCSK9-AAV transfection followed by 1 week to rest mice, and western diet (WD) feeding began at week 0. n=18 WT and n=21 suPAR-Tg mice per group. 2-Way ANOVA. B, Plasma suPAR level assessed by ELISA at baseline and at the end of the study. 2-Way ANOVA. \*\*\*\* =  $P < 0.0001$ .

**Figure S14. Cholesterol, atherosclerotic lesion and necrotic sinus area in wild-type (male n=11, female n=7) and transgenic mice (male n=17, female n=4) over-expressing suPAR stratified by sex**

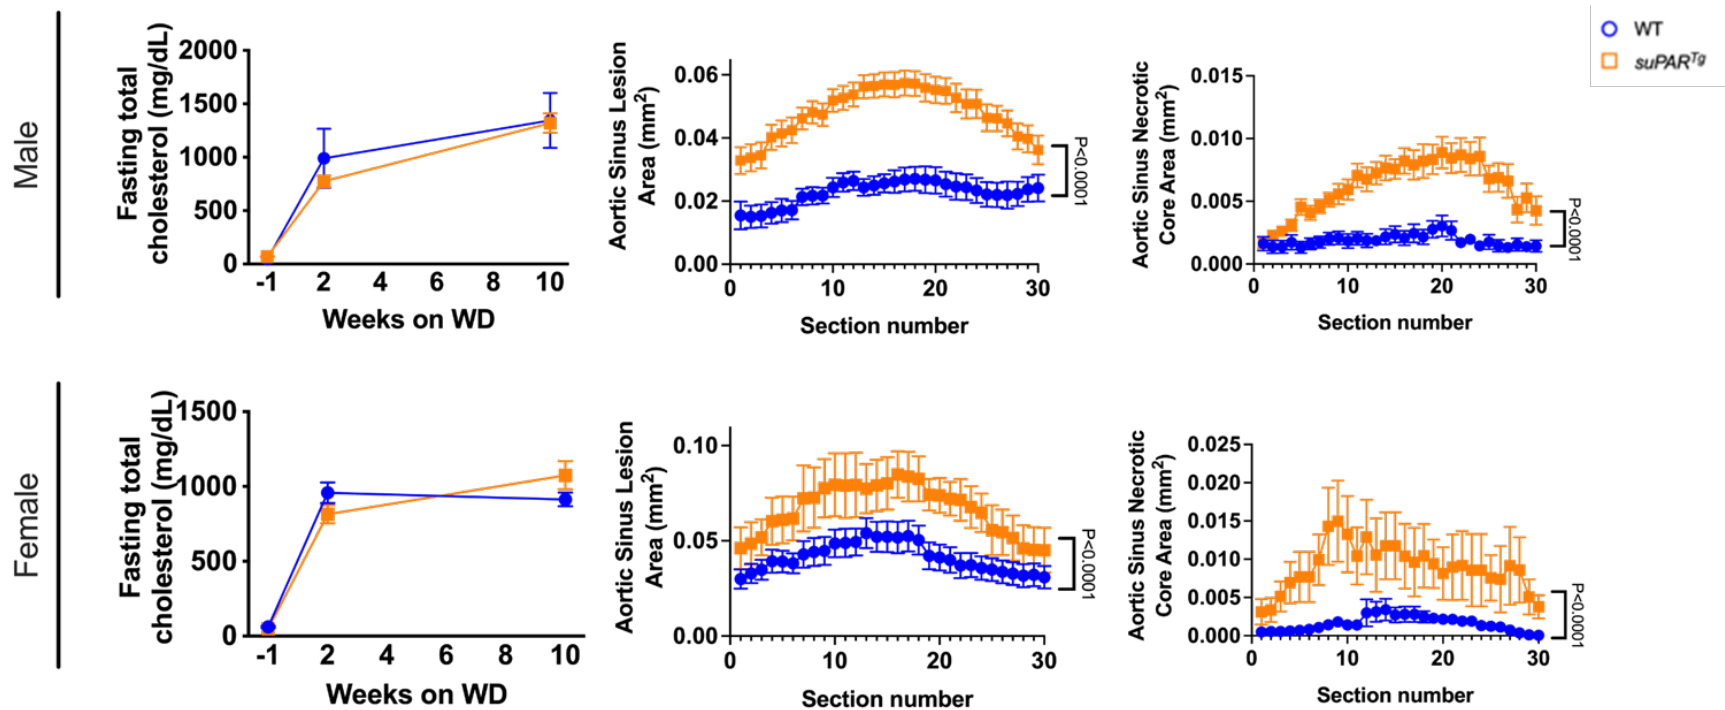

Fasting total cholesterol level of male WT (n=4), male suPAR<sup>Tg</sup> (n=9), female WT (n=5), female suPAR<sup>Tg</sup> (n=5) mice. Aortic sinus atherosclerotic plaque size and necrotic core size for male WT (n=11), male suPAR<sup>Tg</sup> (n=17), female WT (n=7), female suPAR<sup>Tg</sup> (n=4) mice.



**Figure S15. SuPAR is detectable in both wild-type and suPAR-Tg atherosclerotic plaque**

**Wild-type atherosclerotic plaque**

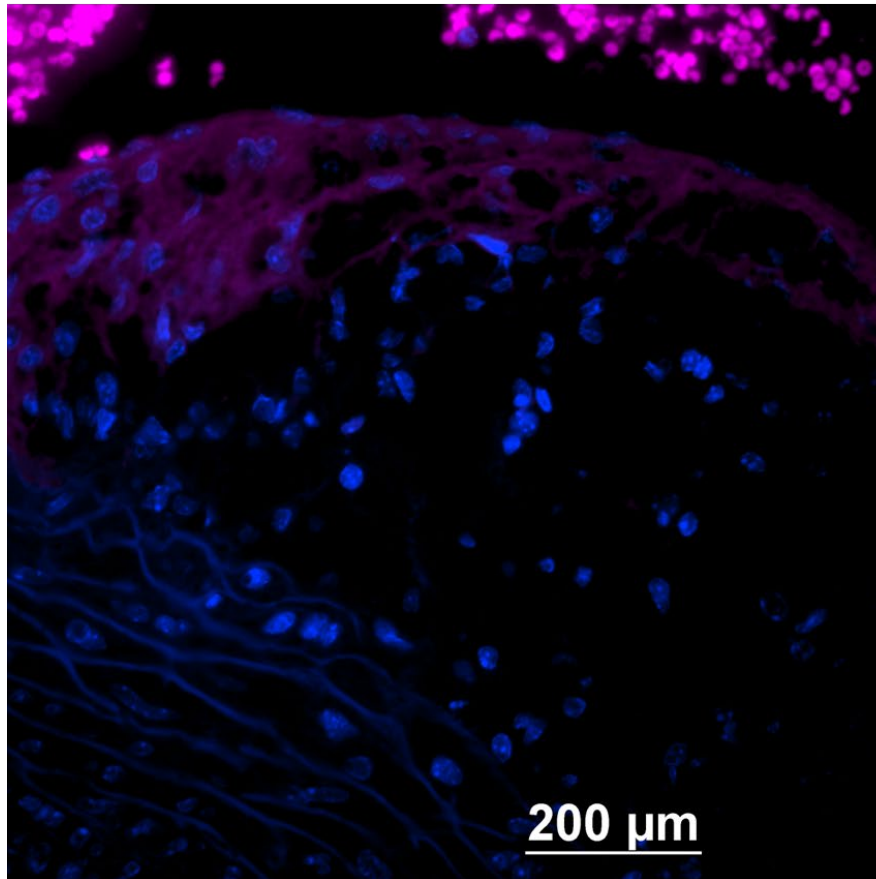

**SuPAR-Tg atherosclerotic plaque**

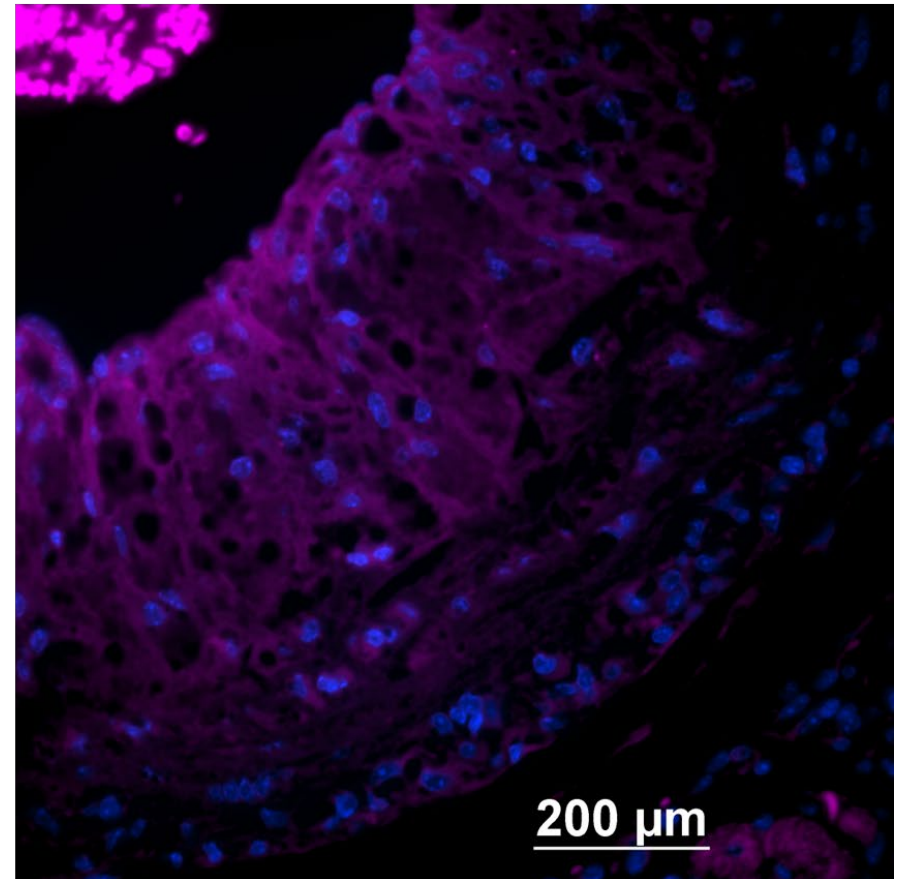

Representative images of immunofluorescence staining uPAR (magenta) in the atherosclerotic aortas of wild-type and suPAR-Tg mice, showing suPAR is detectable in the plaques of both strains, with increased deposition in suPAR-Tg plaque compared to wild-type. Nuclei are counter-stained blue with DAPI. Magnification: x60. Scale bar: 200μm.



**Figure S16. Bone marrow-derived macrophages exhibit a pro-atherogenic phenotype compared to WT bone marrow-derived macrophages**

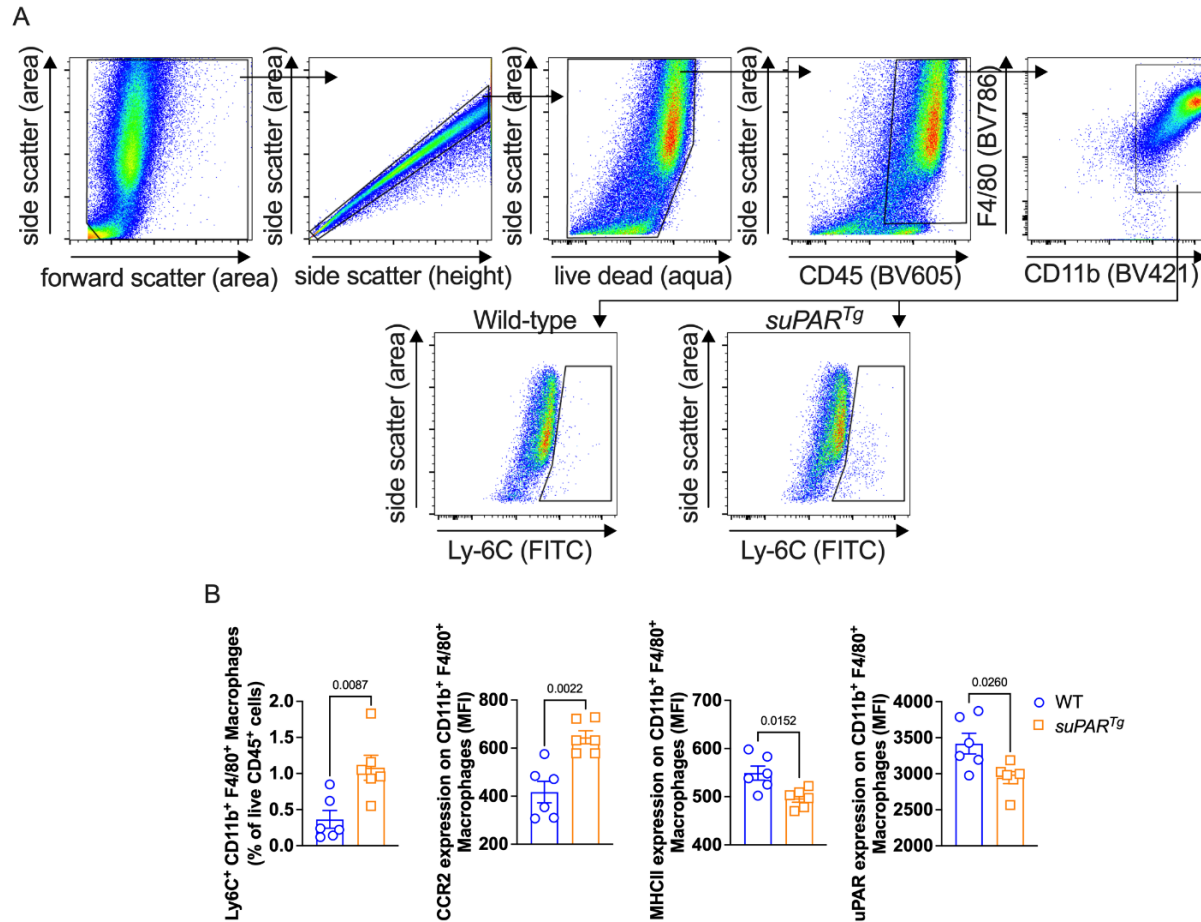

Panel A, More bone marrow-derived macrophages profiled by flow cytometry from *suPAR<sup>Tg</sup>* mice are Ly-6C<sup>+</sup> compared to WT mice and have higher median fluorescence intensity of C-C Motif Chemokine Receptor 2 (CCR2). Bone marrow-derived macrophages profiled by flow cytometry from *suPAR<sup>Tg</sup>* mice have lower median fluorescence intensity expression of major histocompatibility complex II (MHCII) and urokinase plasminogen activator receptor (uPAR). n=6 per group. Mann-Whitney U test. Each point is a biological replicate.

**Figure S17. QQ plots for genome-wide associations with suPAR**

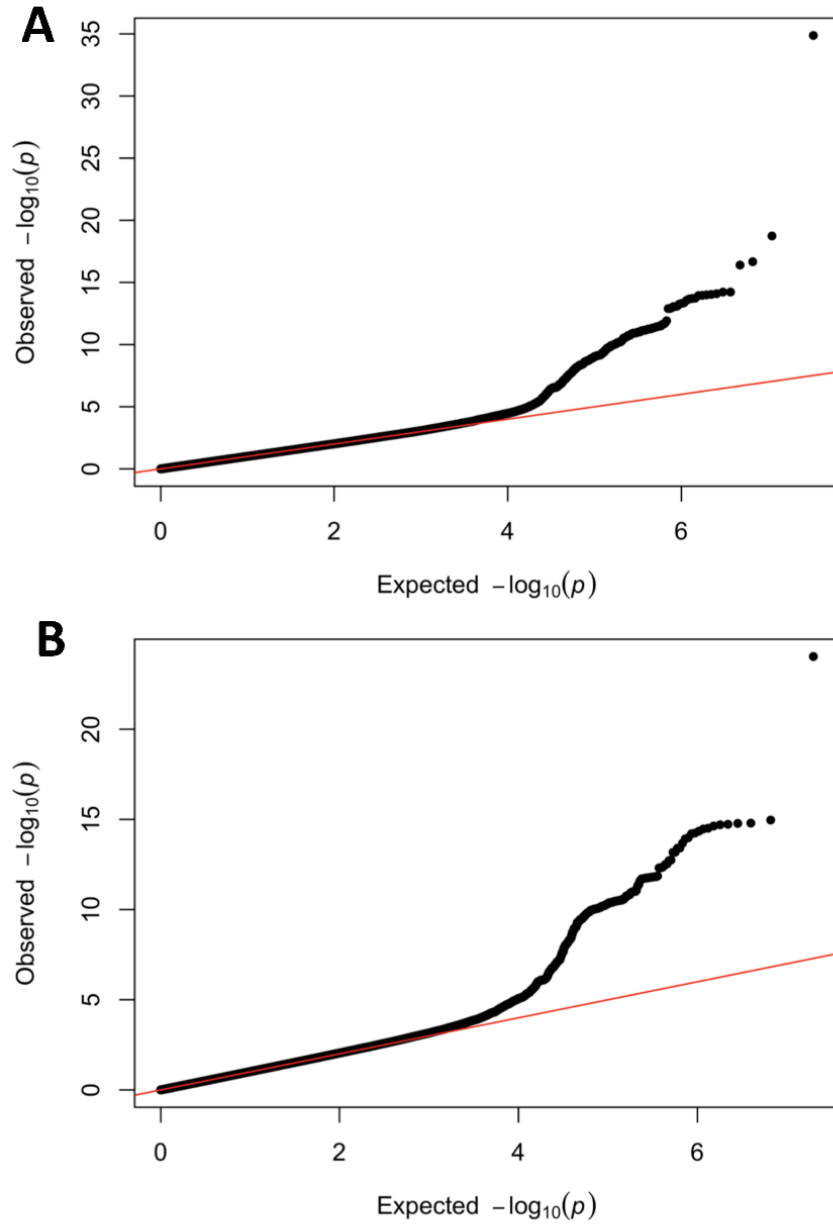

Quantile-Quantile plots for observed versus expected P-values in the multi-ancestry genome-wide meta-analysis (A) or European ancestry meta-analysis (B). The genomic control lambdas were 1.01 and 1.02 in the multi-ancestry and European ancestry analyses, respectively, indicating no evidence of population stratification.

Figure S18. Chromatogram by Sanger sequencing of *PLAUR* reference allele and variants

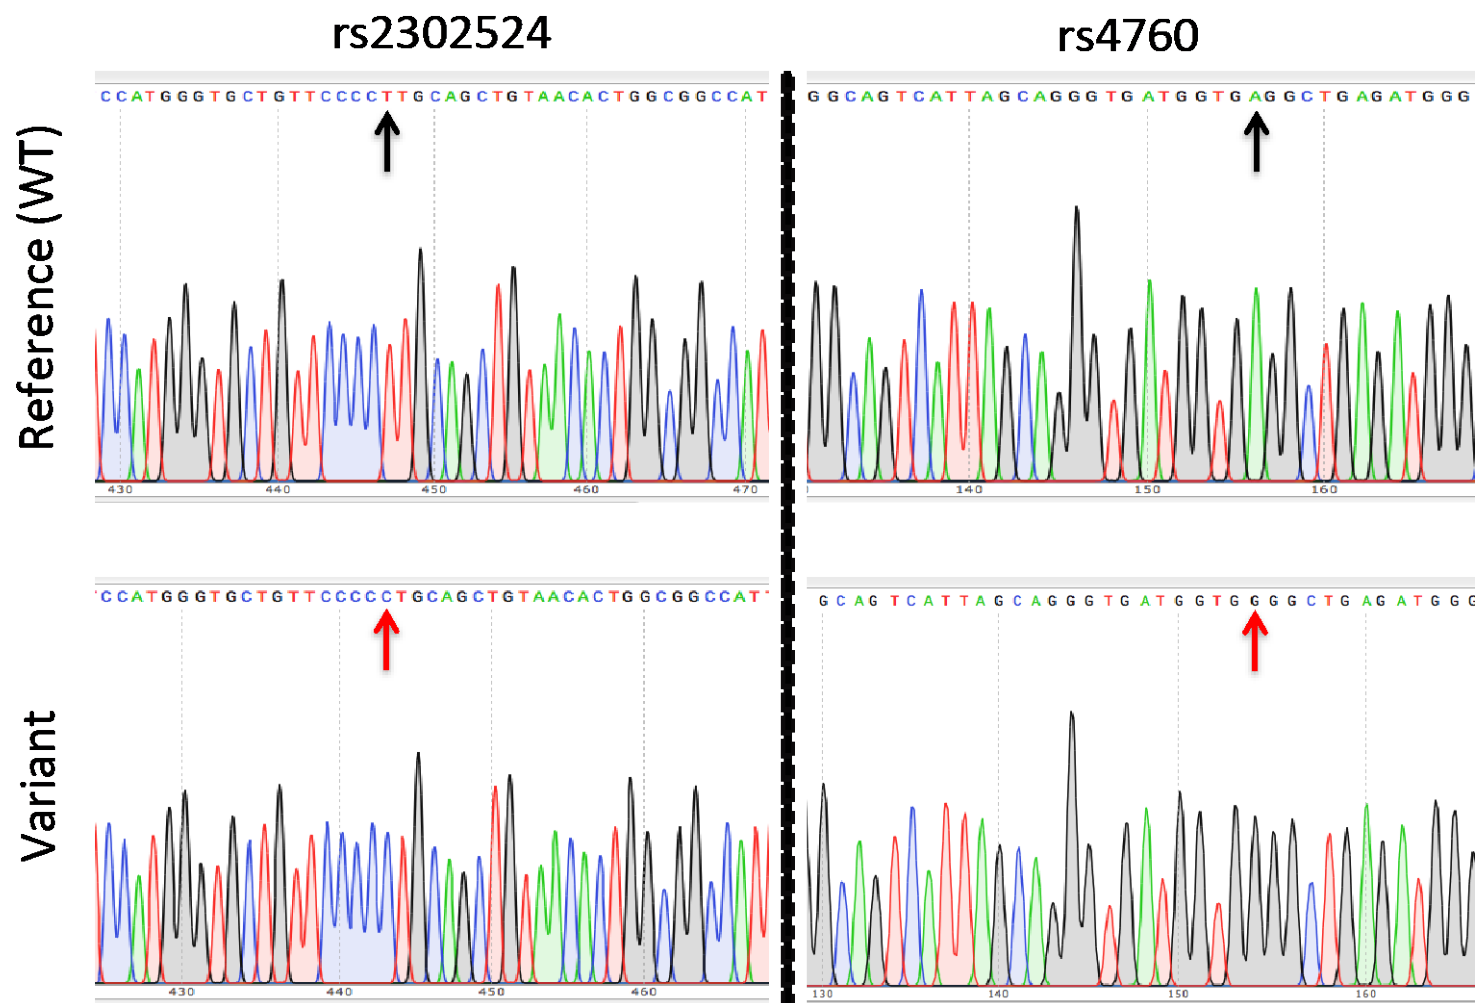

The wild-type *PLAUR* (reference, Gene accession #NM\_002659) was cloned into a pCMV6-entry vector (Origene). The *PLAUR* variants rs2302524 and rs4760 were created using the GeneArt site directed mutagenesis system (Thermo Scientific). Black arrow indicates reference nucleotide. Red arrow indicates variant nucleotide.

**Table S1. Baseline characteristics of MESA cohort by suPAR categories**

|                                            | Total (n=5,406)   | 0-2.0 ng/mL<br>(n=1456) | 2.0-2.5 ng/mL<br>(n=1357) | 2.5-3.0 ng/mL<br>(n=1099) | >3.0 ng/mL<br>(n=1494) | P-value |
|--------------------------------------------|-------------------|-------------------------|---------------------------|---------------------------|------------------------|---------|
| <b>Demographics</b>                        |                   |                         |                           |                           |                        |         |
| Age (years), mean (SD)                     | 63 (10)           | 59 (9)                  | 62 (10)                   | 65 (10)                   | 65 (11)                | <0.001  |
| Male, n (%)                                | 2620 (48.5)       | 858 (58.9)              | 644 (47.5)                | 502 (45.7)                | 616 (41.2)             | <0.001  |
| Race/ethnicity, n (%)                      |                   |                         |                           |                           |                        | <0.001  |
| African American                           | 1464 (27.1)       | 421 (28.9)              | 328 (24.2)                | 270 (24.6)                | 445 (29.8)             |         |
| Chinese American                           | 667 (12.3)        | 321 (22.0)              | 153 (11.3)                | 89 (8.1)                  | 104 (7.0)              |         |
| Hispanic                                   | 1221 (22.6)       | 205 (14.1)              | 341 (25.1)                | 293 (26.7)                | 382 (25.6)             |         |
| White                                      | 2054 (38.0)       | 509 (35.0)              | 535 (39.4)                | 447 (40.7)                | 563 (37.7)             |         |
| <b>Cardiovascular disease risk factors</b> |                   |                         |                           |                           |                        |         |
| Body mass index, mean (SD)                 | 28 (5)            | 27 (5)                  | 28 (5)                    | 29 (6)                    | 29 (6)                 | <0.001  |
| Ever smoker, n (%)                         | 2664 (49.5)       | 656 (45.3)              | 651 (48.1)                | 560 (51.2)                | 797 (53.5)             | <0.001  |
| Diabetes, n (%)                            | 685 (12.7)        | 121 (8.3)               | 149 (11.0)                | 135 (12.3)                | 280 (18.7)             | <0.001  |
| Hypertension, n (%)                        | 2448 (45.3)       | 536 (36.8)              | 563 (41.5)                | 499 (45.4)                | 850 (56.9)             | <0.001  |
| <b>Laboratory values, median (IQR)</b>     |                   |                         |                           |                           |                        |         |
| eGFR, mL/min                               | 77.3 (66.2, 88.2) | 82.4 (71.8, 92.6)       | 78.3 (67.9, 88.2)         | 74.9 (64.4, 86.2)         | 72.0 (60.4, 85.7)      | <0.001  |
| Total cholesterol, mg/dL                   | 192 (170, 216)    | 193 (173, 215)          | 195 (172, 217)            | 192 (171, 216)            | 188 (165, 213)         | <0.001  |
| High-density cholesterol, mg/dL            | 48 (40, 59)       | 49 (41, 60)             | 50 (41, 60)               | 48 (40, 59)               | 46 (39, 56)            | <0.001  |
| Low-density cholesterol, mg/dL             | 116 (96, 136)     | 118 (98, 136)           | 117 (97, 136)             | 116 (95, 135)             | 112 (92, 136)          | <0.001  |
| suPAR, ng/mL                               | 2.5 (2.0, 3.1)    | 1.7 (1.5, 1.9)          | 2.3 (2.1, 2.4)            | 2.7 (2.6, 2.9)            | 3.7 (3.3, 4.3)         | <0.001  |
| Coronary artery calcium, AU                | 1.9 (0, 97.9)     | 0 (0, 47.2)             | 0 (0, 82.6)               | 5.5 (0, 148.0)            | 12.2 (0, 146.4)        | <0.001  |

**Table S2. Adjusted association between suPAR level and baseline CAC score at baseline in MESA**

|                                       | <b>β<sup>a</sup> (95% CI)</b> | <b>P-value</b> |
|---------------------------------------|-------------------------------|----------------|
| Age, years                            | 10.4 (9.1, 11.7)              | <0.001         |
| Race/ethnicity, n (%)                 |                               |                |
| White                                 | 1.0 [reference]               |                |
| African American                      | -96.7 (-124.9, -68.4)         | <0.001         |
| Hispanic                              | -67.9 (-97.4, -38.4)          | <0.001         |
| Chinese American                      | -89.9 (-127.3, -52.5)         | <0.001         |
| Male                                  | 153.2 (128.5, 178.0)          | <0.001         |
| Body mass index, kg/m <sup>2</sup>    | 2.8 (0.5, 5.2)                | 0.018          |
| Ever smoker                           | 22.7 (0.3, 45.0)              | 0.047          |
| Diabetes                              | 86.1 (52.0, 120.1)            | <0.001         |
| Hypertension                          | 65.6 (41.7, 89.3)             | <0.001         |
| eGFR, per 5 mL/min                    | 5.4 (-2.5, 13.3)              | 0.18           |
| High-density cholesterol, per 5 mg/dL | 2.1 (-6.3, 10.5)              | 0.63           |
| Low-density cholesterol, per 10mg/dL  | 1.3 (-2.2, 4.7)               | 0.47           |
| C-reactive protein, per mg/L          | -9.1 (0.3, 50.0)              | 0.015          |
| <b>SuPAR</b>                          | <b>28.7 (8.0, 49.5)</b>       | <b>0.007</b>   |

<sup>a</sup>Beta corresponds to each 2-fold difference in suPAR levels

Abbreviations: CAC, coronary artery calcium; CI, confidence interval; suPAR, soluble urokinase plasminogen activator receptor

**Table S3. Longitudinal association between baseline suPAR levels and CAC score during follow-up in MESA**

|                                       | <b>B (95% CI)</b>       | <b>P-value</b>   |
|---------------------------------------|-------------------------|------------------|
| Age, years                            | 0.9 (0.4, 1.5)          | <0.001           |
| Race/ethnicity, n (%)                 |                         |                  |
| White                                 | 1.0 [reference]         |                  |
| African American                      | -6.1 (-18.5, 6.3)       | 0.33             |
| Hispanic                              | -9.2 (-22.6, 4.1)       | 0.17             |
| Chinese American                      | -11.6 (-23.7, 0.5)      | 0.06             |
| Male                                  | 14.6 (4.8, 24.4)        | 0.003            |
| Body mass index, kg/m <sup>2</sup>    | 0.6 (-0.6, 1.7)         | 0.34             |
| Ever smoker                           | 3.9 (-4.8, 12.5)        | 0.38             |
| Diabetes                              | 19.3 (11.9, 26.7)       | <0.001           |
| Hypertension                          | 19.3 (10.3, 28.4)       | <0.001           |
| eGFR, per 5 mL/min                    | -1.6 (-5.7, 2.5)        | 0.45             |
| High-density cholesterol, per 5 mg/dL | -1.5 (-4.8, 1.8)        | 0.37             |
| Low-density cholesterol, per 10mg/dL  | 0.01 (-1.4, 1.4)        | 0.98             |
| Baseline CAC                          | 1.3 (1.2, 1.3)          | <0.001           |
| Follow-up, years                      | 15.6 (5.2, 25.9)        | 0.005            |
| C-reactive protein, per mg/L          | 1.62 (-1.36, 4.61)      | 0.29             |
| SuPAR, per 100% increase <sup>a</sup> | -24.4 (-38.2, -10.7)    | <0.001           |
| <b>SuPAR*follow-up<sup>b</sup></b>    | <b>15.0 (6.6, 23.4)</b> | <b>&lt;0.001</b> |

<sup>a</sup>Beta corresponds to each 2-fold difference in suPAR levels

<sup>b</sup>Beta corresponds to yearly increase in the CAC score per 2-fold difference in suPAR levels

**Table S4. Multivariable survival analysis for baseline suPAR levels and CVD events in MESA**

|                                          | HR (95% CI)              | P-value          |
|------------------------------------------|--------------------------|------------------|
| Age, years                               | 1.06 (1.05, 1.07)        | <0.001           |
| Race/ethnicity, n (%)                    |                          |                  |
| White                                    | 1.0 [reference]          |                  |
| African American                         | 0.82 (0.68, 0.99)        | 0.034            |
| Hispanic                                 | 0.96 (0.80, 1.16)        | 0.66             |
| Chinese American                         | 0.87 (0.67, 1.12)        | 0.27             |
| Male                                     | 1.82 (1.54, 2.14)        | <0.001           |
| Body mass index, per 5 kg/m <sup>2</sup> | 1.01 (0.93, 1.09)        | 0.86             |
| Ever smoker                              | 1.12 (1.01, 1.11)        | 0.024            |
| Diabetes                                 | 1.70 (1.42, 2.03)        | <0.001           |
| Hypertension                             | 1.83 (1.56, 2.14)        | <0.001           |
| eGFR, per 5 mL/min                       | 1.01 (0.96, 1.06)        | 0.74             |
| High-density cholesterol, per 5 mg/dL    | 0.94 (0.88, 0.99)        | 0.032            |
| Low-density cholesterol, per 10mg/dL     | 1.03 (1.01, 1.06)        | 0.004            |
| C-reactive protein, per mg/L             | 1.06 (1.01, 1.11)        | 0.024            |
| <b>SuPAR, log-base 2</b>                 | <b>1.46 (1.29, 1.65)</b> | <b>&lt;0.001</b> |
| <b>SuPAR, categorical</b>                |                          | <b>&lt;0.001</b> |
| 0-2.0 ng/mL                              | 1.0 [reference]          |                  |
| 2.0-2.5 ng/mL                            | 1.11 (0.88, 1.39)        | 0.37             |
| 2.5-3.0 ng/mL                            | 1.38 (1.09, 1.74)        | 0.006            |
| >3.0 ng/mL                               | 1.77 (1.42, 2.19)        | <0.001           |

Number of cardiovascular disease (CVD) events was 594. A CVD event was defined as the composite of myocardial infarction, resuscitated cardiac arrest, angina, revascularization, stroke (excluding transient ischemic attack), or death due to CVD.

**Table S5. Multivariable survival analysis for baseline suPAR levels and CVD events in MESA with time-varying eGFR**

|                                          | HR (95% CI)              | P-value          |
|------------------------------------------|--------------------------|------------------|
| Age, years                               | 1.06 (1.05, 1.07)        | <0.001           |
| Race/ethnicity, n (%)                    |                          |                  |
| White                                    | 1.0 [reference]          |                  |
| African American                         | 0.83 (0.70, 1.00)        | 0.05             |
| Hispanic                                 | 0.98 (0.81, 1.17)        | 0.82             |
| Chinese American                         | 0.87 (0.68, 1.12)        | 0.28             |
| Male                                     | 1.83 (1.55, 2.16)        | <0.001           |
| Body mass index, per 5 kg/m <sup>2</sup> | 1.00 (0.93, 1.09)        | 0.89             |
| Ever smoker                              | 1.13 (0.97, 1.30)        | 0.11             |
| Diabetes                                 | 1.71 (1.43, 2.04)        | <0.001           |
| Hypertension                             | 1.80 (1.54, 2.11)        | <0.001           |
| eGFR, per 5 mL/min                       | 0.97 (0.95, 1.00)        | 0.08             |
| High-density cholesterol, per 5 mg/dL    | 0.94 (0.89, 1.00)        | 0.037            |
| Low-density cholesterol, per 10mg/dL     | 1.03 (1.01, 1.06)        | 0.005            |
| C-reactive protein, per mg/L             | 1.06 (1.01, 1.11)        | 0.026            |
| <b>SuPAR, log-base 2</b>                 | <b>1.43 (1.26, 1.61)</b> | <b>&lt;0.001</b> |
| <b>SuPAR, categorical</b>                |                          | <b>&lt;0.001</b> |
| 0-2.0 ng/mL                              | 1.0 [reference]          |                  |
| 2.0-2.5 ng/mL                            | 1.10 (0.88, 1.38)        | 0.41             |
| 2.5-3.0 ng/mL                            | 1.36 (1.08, 1.71)        | 0.009            |
| >3.0 ng/mL                               | 1.71 (1.38, 2.12)        | <0.001           |

Number of cardiovascular disease (CVD) events was 594. A CVD event was defined as the composite of myocardial infarction, resuscitated cardiac arrest, angina, revascularization, stroke (excluding transient ischemic attack), or death due to CVD.



**Table S6. Multivariable survival analysis for baseline suPAR levels and CVD events in MESA with high-sensitivity troponin T and NT-proBNP**

|                                          | <b>HR (95% CI)</b>       | <b>P-value</b>   |
|------------------------------------------|--------------------------|------------------|
| Age, years                               | 1.04 (1.03, 1.05)        | <0.001           |
| Race/ethnicity, n (%)                    |                          |                  |
| White                                    | 1.0 [reference]          |                  |
| African American                         | 0.91 (0.74, 1.11)        | 0.39             |
| Hispanic                                 | 1.02 (0.78, 1.34)        | 0.91             |
| Chinese American                         | 0.99 (0.81, 1.21)        | 0.86             |
| Male                                     | 1.43 (1.17, 1.74)        | 0.001            |
| Body mass index, per 5 kg/m <sup>2</sup> | 0.94 (0.87, 1.02)        | 0.15             |
| Ever smoker                              | 1.10 (0.95, 1.28)        | 0.20             |
| Diabetes                                 | 1.56 (1.28, 1.90)        | <0.001           |
| Hypertension                             | 1.70 (1.45, 2.00)        | <0.001           |
| eGFR, per 5 mL/min                       | 1.05 (1.00, 1.10)        | 0.06             |
| High-density cholesterol, per 5 mg/dL    | 0.89 (0.83, 0.95)        | 0.002            |
| Low-density cholesterol, per 10mg/dL     | 1.04 (1.02, 1.06)        | 0.001            |
| C-reactive protein, per mg/L             | 1.07 (1.02, 1.12)        | 0.005            |
| High-sensitivity troponin T (ng/L)       | 1.48 (1.30, 1.70)        | <0.001           |
| NT-proBNP (pg/mL)                        | 1.21 (1.12, 1.31)        | <0.001           |
| <b>SuPAR, log-base 2</b>                 | <b>1.37 (1.21, 1.56)</b> | <b>&lt;0.001</b> |

A CVD event was defined as the composite of myocardial infarction, resuscitated cardiac arrest, angina, revascularization, stroke (excluding transient ischemic attack), or death due to CVD

**Table S7. Top variants from genome-wide association analysis of suPAR in participants with European ancestry**

|             |            |           |                |    |    |       | TSS, GABC, MESA, MDC (n=12,937) |      |                     | DBDS (n=12,177) |      |                     |
|-------------|------------|-----------|----------------|----|----|-------|---------------------------------|------|---------------------|-----------------|------|---------------------|
| SNP         | Chromosome | Position  | Locus          | EA | OA | EAF   | Effect                          | SE   | P-value             | Effect          | SE   | P-value             |
| rs12077698  | 1          | 38088049  | <i>POU3F1</i>  | C  | G  | 0.08  | -0.23                           | 0.04 | $2 \times 10^{-10}$ | 0.00            | 0.04 | 0.96                |
| rs7595388   | 2          | 159899834 | <i>LY75</i>    | A  | G  | 0.34  | -0.10                           | 0.01 | $4 \times 10^{-12}$ | -0.10           | 0.01 | $5 \times 10^{-14}$ |
| rs56172805  | 3          | 98907345  | <i>DCBLD2</i>  | A  | G  | 0.05  | -0.22                           | 0.03 | $3 \times 10^{-11}$ | -0.20           | 0.03 | $7 \times 10^{-10}$ |
| rs79493037  | 6          | 31438048  | <i>MICA</i>    | G  | C  | 0.13  | -0.18                           | 0.03 | $6 \times 10^{-9}$  | -0.06           | 0.03 | 0.02                |
| rs2633313   | 10         | 73924107  | <i>PLAU</i>    | C  | T  | 0.46  | -0.12                           | 0.01 | $1 \times 10^{-15}$ | -0.11           | 0.01 | $1 \times 10^{-18}$ |
| rs240559    | 11         | 126321217 | <i>ST3GAL4</i> | T  | C  | 0.21  | 0.09                            | 0.02 | $3 \times 10^{-8}$  | 0.05            | 0.01 | 0.001               |
| rs3967200   | 11         | 126362490 | <i>ST3GAL4</i> | T  | C  | 0.17  | -0.13                           | 0.02 | $1 \times 10^{-9}$  | -0.14           | 0.02 | $2 \times 10^{-14}$ |
| rs535064984 | 17         | 7116978   | <i>ASGR2</i>   | C  | T  | 0.004 | -0.93                           | 0.17 | $4 \times 10^{-8}$  | 0.54            | 0.09 | $4 \times 10^{-9}$  |
| rs55714927  | 17         | 7176997   | <i>ASGR1</i>   | T  | C  | 0.16  | 0.12                            | 0.02 | $2 \times 10^{-11}$ | 0.12            | 0.02 | $2 \times 10^{-14}$ |
| rs4251824   | 19         | 43666441  | <i>PLAUR</i>   | T  | C  | 0.04  | -0.24                           | 0.04 | $1 \times 10^{-11}$ | -0.24           | 0.03 | $4 \times 10^{-17}$ |
| rs2302524   | 19         | 43652320  | <i>PLAUR</i>   | C  | T  | 0.17  | 0.20                            | 0.02 | $9 \times 10^{-25}$ | 0.10            | 0.02 | $3 \times 10^{-8}$  |
| rs4760      | 19         | 43648948  | <i>PLAUR</i>   | G  | A  | 0.10  | 0.13                            | 0.02 | $2 \times 10^{-10}$ | 0.08            | 0.02 | $6 \times 10^{-6}$  |

Abbreviations: GABC: Genes of Blood-Clotting Cohort; DBDS: Danish Blood Donor Study; EA, Effect Allele; EAF, Effect Allele Frequency; MESA: Multi-Ethnic Study of Atherosclerosis; MDC: Malmo Diet and Cancer study; OA, Other Allele; SE, Standard Error; SNP, Single Nucleotide Polymorphism; TSS: Trinity Student Study.

**Table S8. Finemapped signals of the *PLAUR* locus using SuSie.**

| <b>rsid</b> | <b>POS37</b> | <b>Allele 1</b> | <b>Allele 2</b> | <b>Effect</b> | <b>Standard error</b> | <b>P-value</b>         | <b>Posterior Inclusion Probability (PIP)</b> | <b>Credible set</b> |
|-------------|--------------|-----------------|-----------------|---------------|-----------------------|------------------------|----------------------------------------------|---------------------|
| rs2302524   | 44156472     | T               | C               | -0.1959       | 0.0191                | $9.31 \times 10^{-25}$ | 1                                            | 1                   |
| rs4760      | 44153100     | A               | G               | -0.1316       | 0.0208                | $2.38 \times 10^{-10}$ | 0.999998049                                  | 2                   |
| rs4251824   | 44170593     | T               | C               | -0.2401       | 0.0354                | $1.21 \times 10^{-11}$ | 0.487264651                                  | 3                   |
| rs117564136 | 44177700     | T               | C               | 0.1374        | 0.0259                | $1.08 \times 10^{-07}$ | 0.83801097                                   | 4                   |
| rs400058    | 44141015     | T               | C               | 0.0362        | 0.0163                | 0.026                  | 0.999543437                                  | 4                   |

**Table S9. UK Biobank Disease Phenotype Definitions**

| Disease phenotype              | Definition                                                                                                                                                                                                                                                                                                                                                                                                                                                                                                                                                                                                                                                                                                                                                                                                                                  |
|--------------------------------|---------------------------------------------------------------------------------------------------------------------------------------------------------------------------------------------------------------------------------------------------------------------------------------------------------------------------------------------------------------------------------------------------------------------------------------------------------------------------------------------------------------------------------------------------------------------------------------------------------------------------------------------------------------------------------------------------------------------------------------------------------------------------------------------------------------------------------------------|
| Aortic valve stenosis          | Self-reported history of aortic stenosis during verbal interview with trained nurse; <u>or</u> hospitalization with or death due to ICD-10 code for rheumatic aortic stenosis (I06.0, I06.2) or nonrheumatic aortic stenosis (I35.0, I35.2)                                                                                                                                                                                                                                                                                                                                                                                                                                                                                                                                                                                                 |
| Atrial fibrillation or flutter | Self-reported history of atrial fibrillation, atrial flutter, or cardioversion during verbal interview with trained nurse; or hospitalization with or death due to ICD-10 code for atrial fibrillation or atrial flutter (I48); or hospitalization with ICD-9 code for atrial fibrillation or atrial flutter (4273); or hospitalization with OPCS-4 code for percutaneous transluminal ablation (K57.1, K62.1, K62.2, K62.3, K62.4)                                                                                                                                                                                                                                                                                                                                                                                                         |
| Coronary artery disease        | Self-reported history of myocardial infarction, coronary artery bypass grafting, coronary artery angioplasty or triple heart bypass during verbal interview with trained nurse; or hospitalization for or death due to ICD-10 code for acute or subsequent myocardial infarction (I21, I22, I23, I24.1, I25.2); or hospitalization due to ICD-9 code for myocardial infarction (410, 411, 412); or hospitalization due to OPCS-4 code for coronary artery bypass grafting (K40, K41, K44, K45, K46), coronary endarterectomy (K47.1), or coronary angioplasty ± stenting (K49, K50.2, K75)                                                                                                                                                                                                                                                  |
| Heart failure                  | Self-reported history of heart failure or cardiomyopathy during verbal interview with trained nurse; or hospitalization for or death due to ICD-10 code for hypertensive heart disease, cardiomyopathy or heart failure (I11.0, I13.0, I13.2, I25.5, I42.0, I42.5, I42.8, I42.9, I50.0, I50.1, I50.9); or hospitalization due to ICD-9 code for heart failure or other primary cardiomyopathies (4254, 4280, 4281, 4289); excluding individuals with history of hypertrophic cardiomyopathy during verbal interview with trained nurse, or hospitalization for or death due to ICD-10 code for hypertrophic cardiomyopathy (I42.1, I42.2)                                                                                                                                                                                                   |
| Hypertension                   | Self-reported history of hypertension, essential hypertension or high blood pressure during verbal interview with trained nurse; or hospitalization with or death due to ICD-10 code for essential hypertension, hypertensive heart disease, hypertensive renal disease, or secondary hypertension (I10, I11, I12, I13, I15); or hospitalization with ICD-9 code for essential hypertension, hypertensive heart disease, hypertensive renal disease, or secondary hypertension (401, 402, 403, 404, 405)                                                                                                                                                                                                                                                                                                                                    |
| Intracerebral hemorrhage       | Self-reported history of brain hemorrhage during verbal interview with trained nurse; <u>or</u> hospitalization with or death due to ICD-10 code for nontraumatic intracerebral hemorrhage (I61); <u>or</u> hospitalization with or death due to ICD-9 code for intracerebral hemorrhage (431), as adjudicated centrally by the UK Biobank                                                                                                                                                                                                                                                                                                                                                                                                                                                                                                  |
| Ischemic stroke                | Self-reported history of ischemic stroke during verbal interview with trained nurse; <u>or</u> hospitalization with or death due to ICD-10 code for cerebral infarction, or unspecified stroke (I63, 64); <u>or</u> hospitalization with or death due to ICD-9 code for occlusion of cerebral arteries or acute cerebrovascular disease (434, 436), as adjudicated centrally by the UK Biobank                                                                                                                                                                                                                                                                                                                                                                                                                                              |
| Myocardial infarction          | Self-reported history of myocardial infarction or hospitalization or death due to ICD-10 code for acute or subsequent myocardial infarction (I21, I22, I23, I24.1, I25.2); or hospitalization due to ICD-9 code for myocardial infarction (410, 411, 412)                                                                                                                                                                                                                                                                                                                                                                                                                                                                                                                                                                                   |
| Peripheral artery disease      | Self-reported history of peripheral vascular disease, arterial embolism, intermittent claudication, leg artery bypass, leg artery angioplasty, or leg amputation during verbal interview with trained nurse; or hospitalization with or death due to ICD-10 code for atherosclerosis of (non-coronary) arteries or peripheral vascular disease (I70.0, I70.00, I70.01, I70.2, I70.20, I70.21, I70.8, I70.80, I70.9, I70.90, I73.8 or I73.9); or hospitalization with ICD-9 code for atherosclerosis of arteries or peripheral vascular disease (4400, 4402, 4438, 4439); or hospitalization with OPCS-4 coded procedure for leg amputation, or leg artery procedure such as bypass, stent or angioplasty (X09.3-09.5, L21.6, L51.3, L51.6, L51.8, L52.1, L52.2, L54.1, L54.4, L54.8, L59.1-L59.8, L60.1, L60.2, L63.1, L63.5, L63.9, L66.7) |

|                         |                                                                                                                                                                                                                                                                                                                                                                                                                                                                                                                                                                                                                                                                    |
|-------------------------|--------------------------------------------------------------------------------------------------------------------------------------------------------------------------------------------------------------------------------------------------------------------------------------------------------------------------------------------------------------------------------------------------------------------------------------------------------------------------------------------------------------------------------------------------------------------------------------------------------------------------------------------------------------------|
| Pulmonary embolism      | Self-reported history of pulmonary embolism during verbal interview with trained nurse; <u>or</u> hospitalization with or death due to ICD-10 code for pulmonary embolism (I26); <u>or</u> hospitalization with ICD-9 code for pulmonary embolism (4151)                                                                                                                                                                                                                                                                                                                                                                                                           |
| Stroke                  | Self-reported history of stroke during verbal interview with trained nurse; or hospitalization with or death due to ICD-10 code for nontraumatic subarachnoid hemorrhage, nontraumatic intracerebral hemorrhage, cerebral infarction, or unspecified stroke (I60-64); or hospitalization with or death due to ICD-9 code for subarachnoid hemorrhage, intracerebral hemorrhage, occlusion of cerebral arteries, or acute cerebrovascular disease (430, 431, 434, 436), as adjudicated centrally by the UK Biobank ( <a href="http://biobank.ctsu.ox.ac.uk/crystal/refer.cgi?id=462">http://biobank.ctsu.ox.ac.uk/crystal/refer.cgi?id=462</a> )                    |
| Subarachnoid hemorrhage | Self-reported history of subarachnoid hemorrhage during verbal interview with trained nurse; <u>or</u> hospitalization with or death due to ICD-10 code for nontraumatic subarachnoid hemorrhage (I60); <u>or</u> hospitalization with or death due to ICD-9 code for subarachnoid hemorrhage (430), as adjudicated centrally by the UK Biobank                                                                                                                                                                                                                                                                                                                    |
| Venous thromboembolism  | Self-reported history of venous thromboembolic disease, pulmonary embolism or deep venous thrombosis during verbal interview with trained nurse; <u>or</u> hospitalization with or death due to ICD-10 code for pulmonary embolism (I26), phlebitis or thrombophlebitis (I80.0-I80.3, I80.8-I80.9), portal vein thrombosis (I81), Budd-Chiari syndrome (I82.0), or other coagulation defects (D68); <u>or</u> hospitalization with ICD-9 code for pulmonary embolism or phlebitis/thrombophlebitis (4151, 4511); <u>or</u> hospitalization with OPCS-4 code for insertion of inferior vena cava filter or open thrombectomy of lower extremity vein (L79.1, L90.2) |

## REFERENCES

1. Liang OD, Chavakis T, Kanse SM, Preissner KT. Ligand binding regions in the receptor for urokinase-type plasminogen activator. *J Biol Chem* 2001;276:28946-53.
